# Supplementary material for: Using Quinolin-4-Ones as Convenient Common Precursors for a Metal-Free Total Synthesis of Both Dubamine and Graveoline Alkaloids and Diverse Structural Analogues
Source: MDPI journal article supplement (doi:10.3390/molecules29091959), 2024-04-25

# Supporting Information

## Using Quinolin-4-ones as Convenient Common Precursors for a Metal-free Total Synthesis of Both Dubamine and Graveoline Alkaloids and Diverse Structural Analogues

Rodrigo Abonia <sup>1,\*</sup> Lorena Cabrera <sup>1</sup>, Diana Arteaga <sup>1</sup>, Daniel Insuasty <sup>1,2,\*</sup>, Jairo Quiroga <sup>1</sup>, Paola Cuervo <sup>1,3</sup>, and Henry Insuasty <sup>4</sup>

<sup>1</sup> Research Group of Heterocyclic Compounds, Department of Chemistry, Universidad del Valle, A. A. 25360, Cali, Colombia; rodrigo.abonia@correounivalle.edu.co; lorena.cabrera@correounivalle.edu.co; diana.arteaga@correounivalle.edu.co; jairo.quiroga@correounivalle.edu.co

<sup>2</sup> Grupo de Investigación en Química y Biología, Departamento de Química y Biología, Universidad del Norte, Barranquilla Atlántico 081007, Colombia; insuastyd@uninorte.edu.co.

<sup>3</sup> Grupo de Estudios en Síntesis y Aplicaciones de Compuestos Heterocíclicos, Universidad Nacional de Colombia, Facultad de Ciencias, Departamento de Química, AA 14490, Bogotá, Colombia; pacuervop@unal.edu.co

<sup>4</sup> Departamento de Química, Universidad de Nariño, Calle 18 No. 50-02 Torobajo, Pasto, Colombia; hein@udenar.edu.co

\* Correspondence: rodrigo.abonia@correounivalle.edu.co

## Table of Contents

|                                                                                                                                                                          |    |
|--------------------------------------------------------------------------------------------------------------------------------------------------------------------------|----|
| <sup>1</sup> H and <sup>13</sup> C NMR spectra for compounds <b>22a-i</b> , <b>23a-h</b> , <b>24a-h</b> , <b>26a</b> , Graveoline ( <b>1</b> ) and Dubamine ( <b>2</b> ) | S2 |
|--------------------------------------------------------------------------------------------------------------------------------------------------------------------------|----|

22a

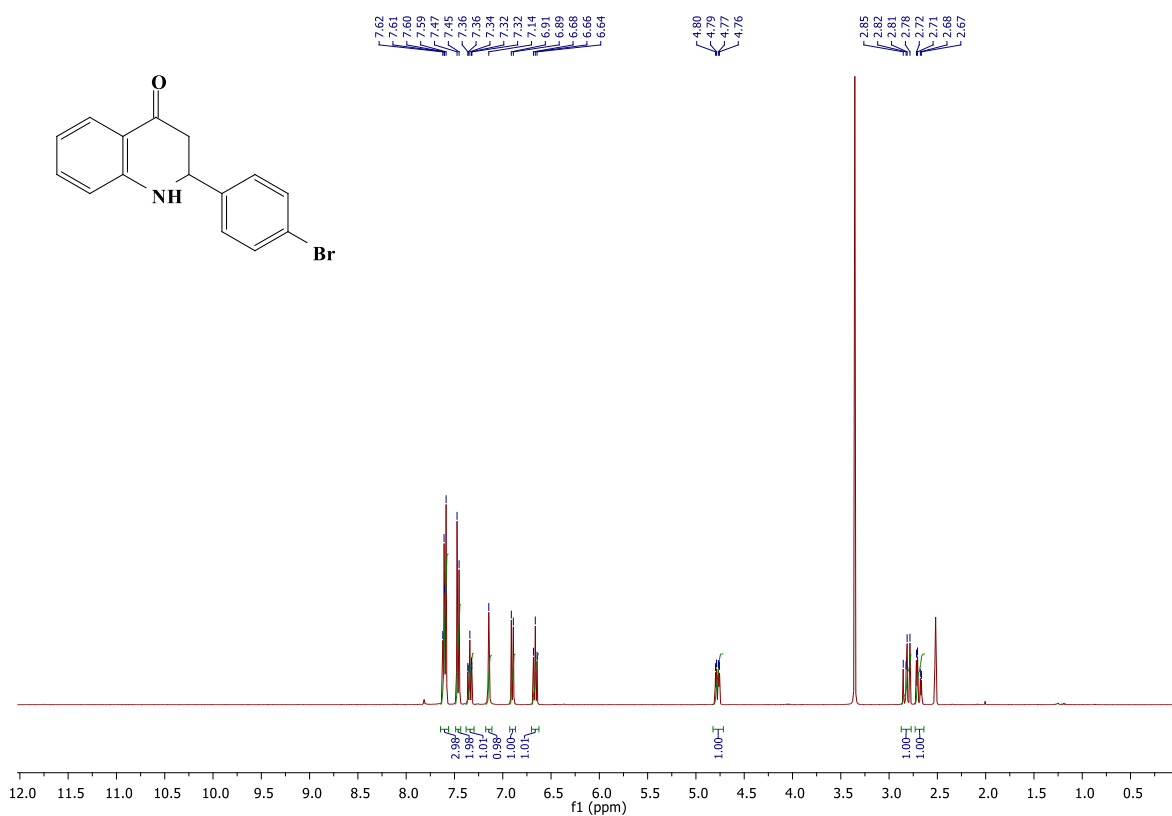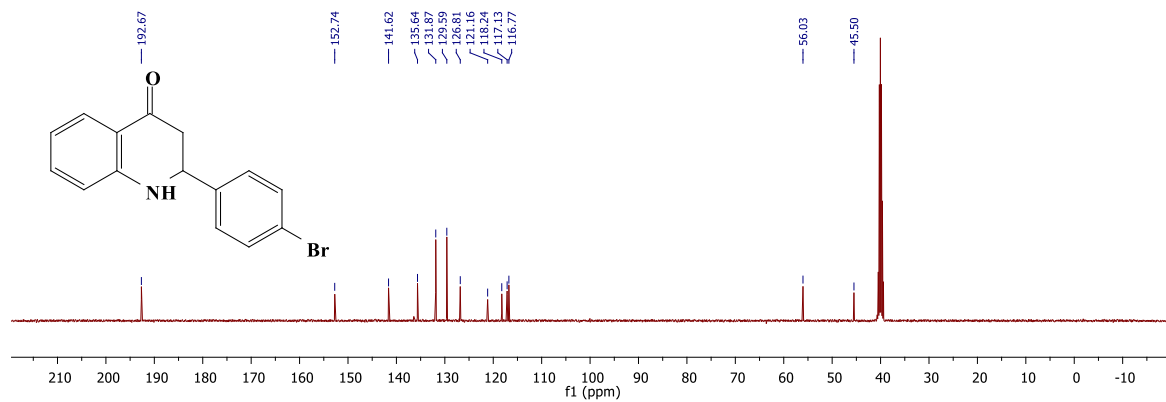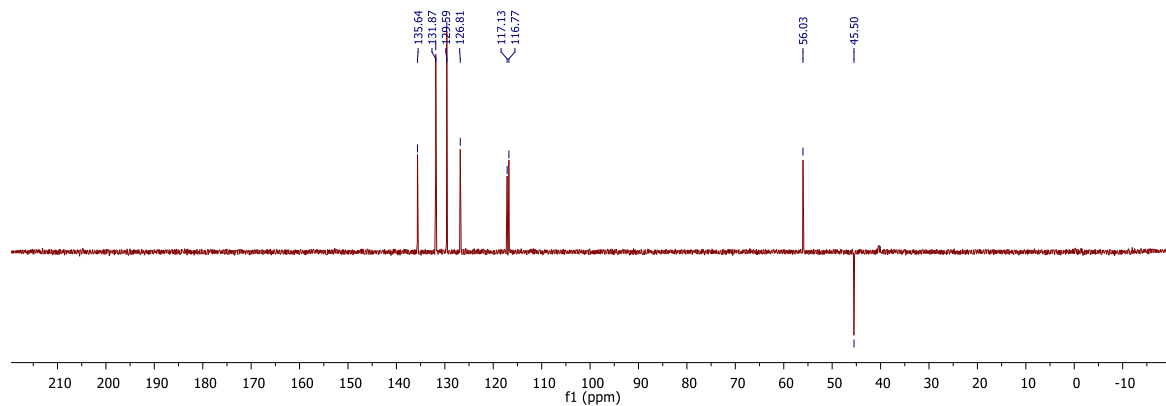

22b

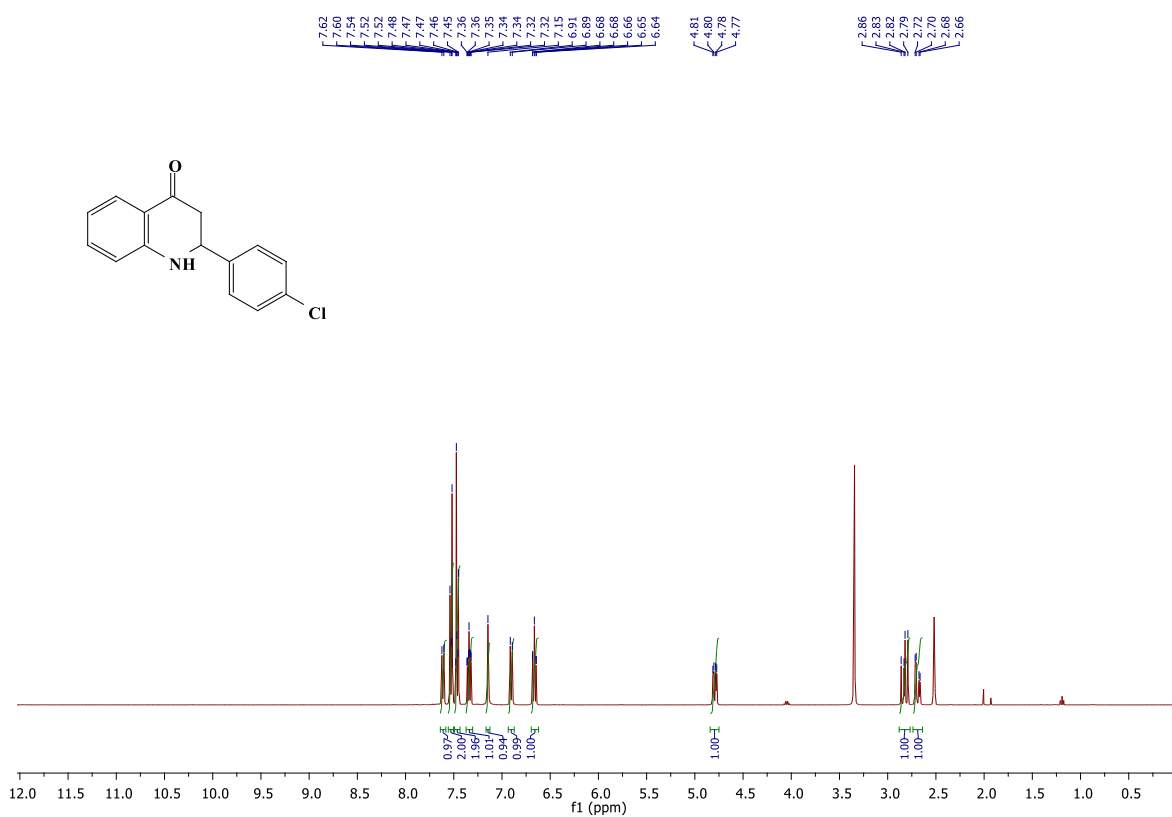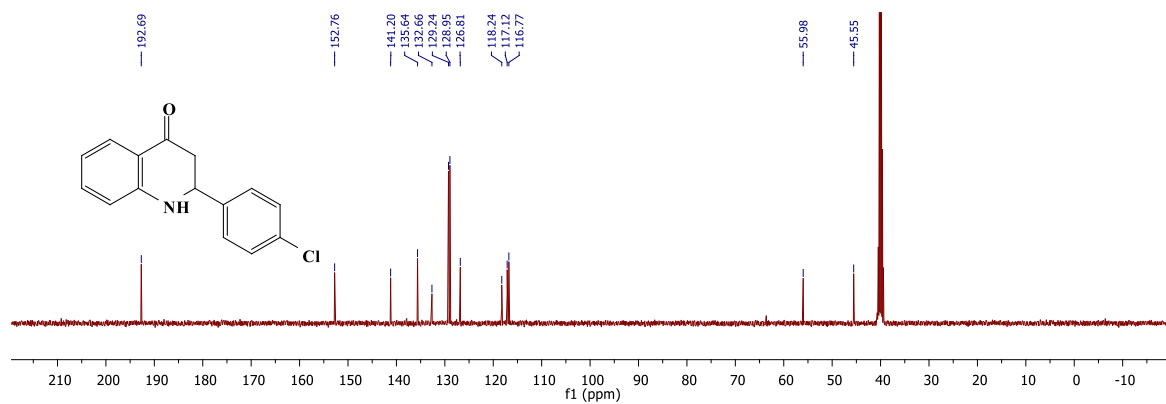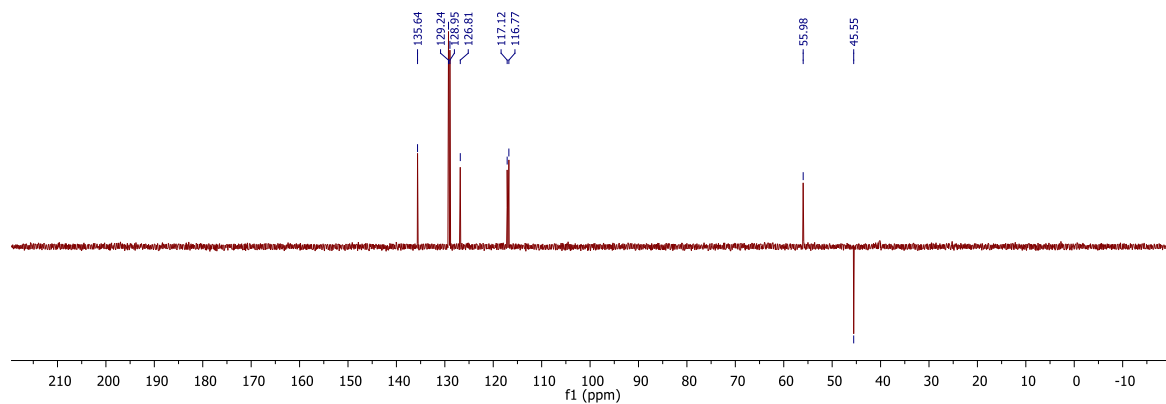

22c

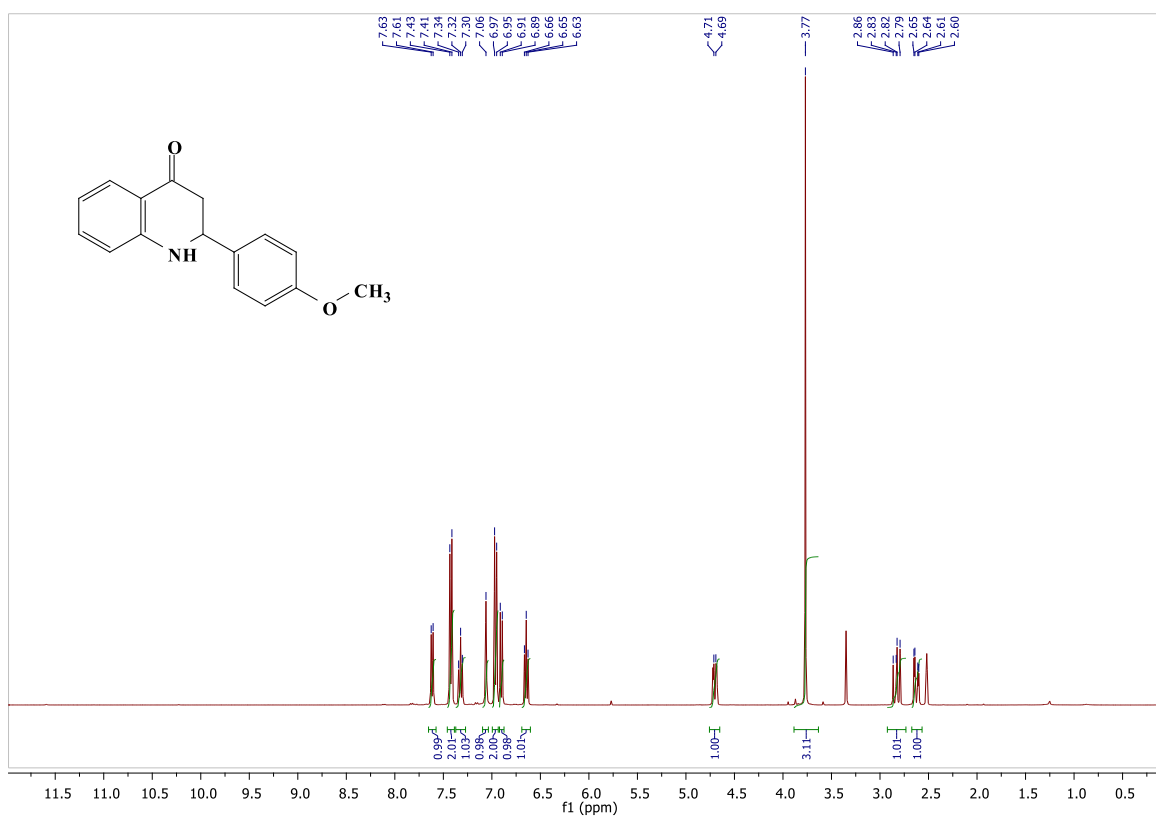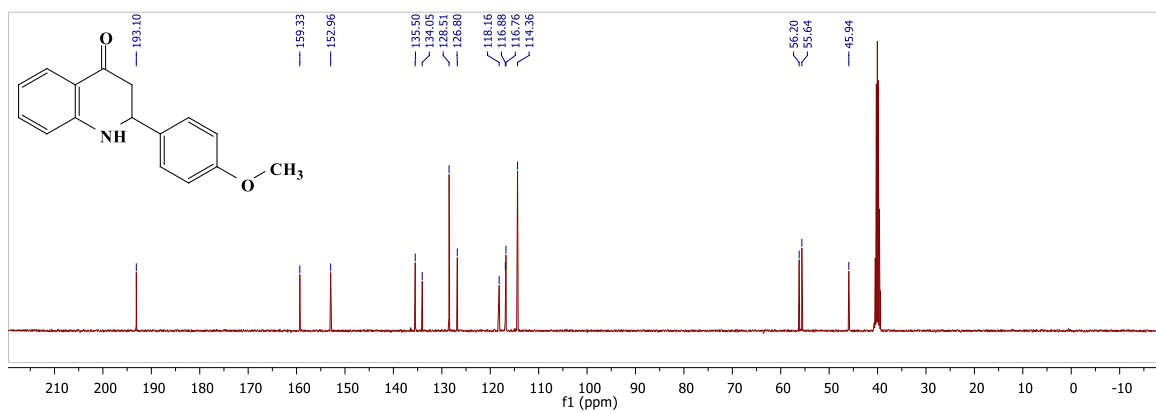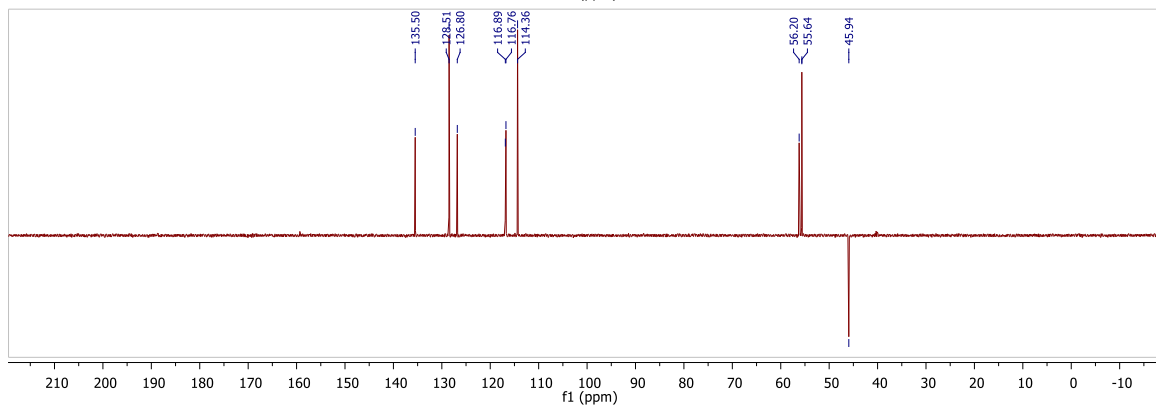

22d

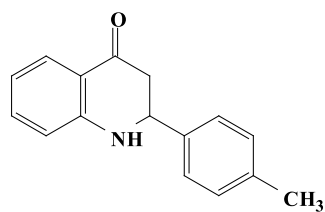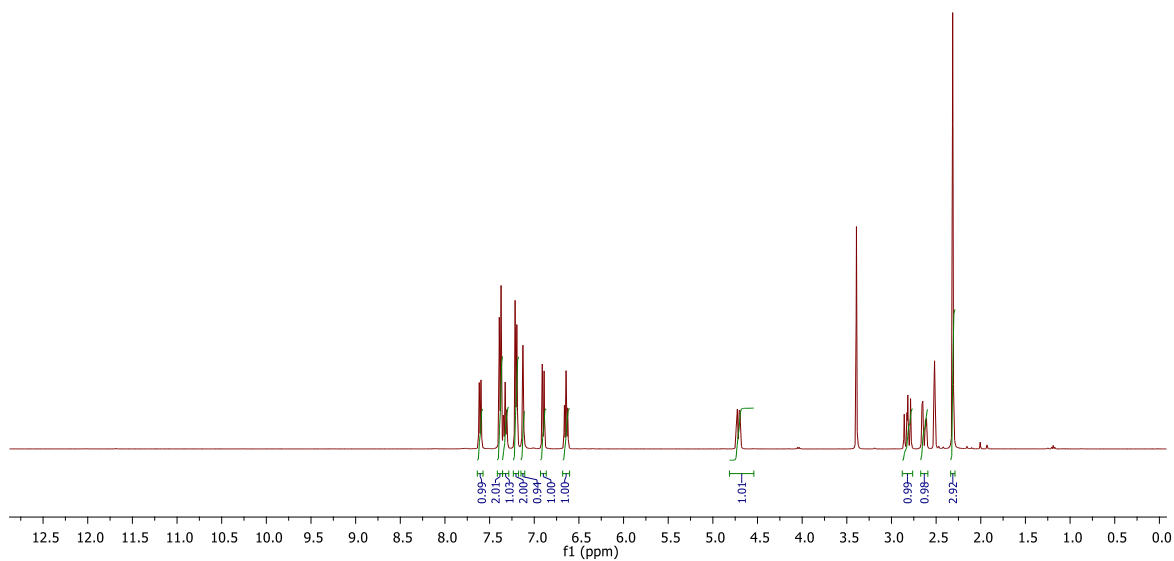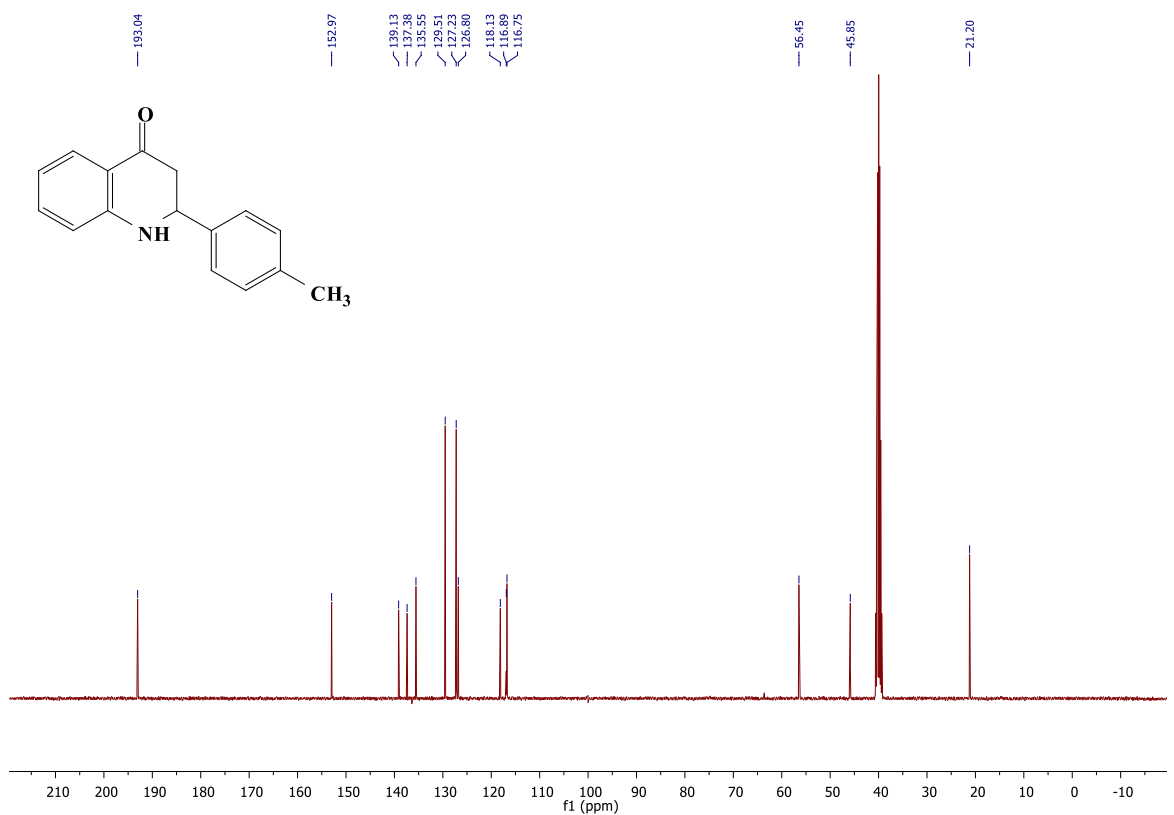

22e

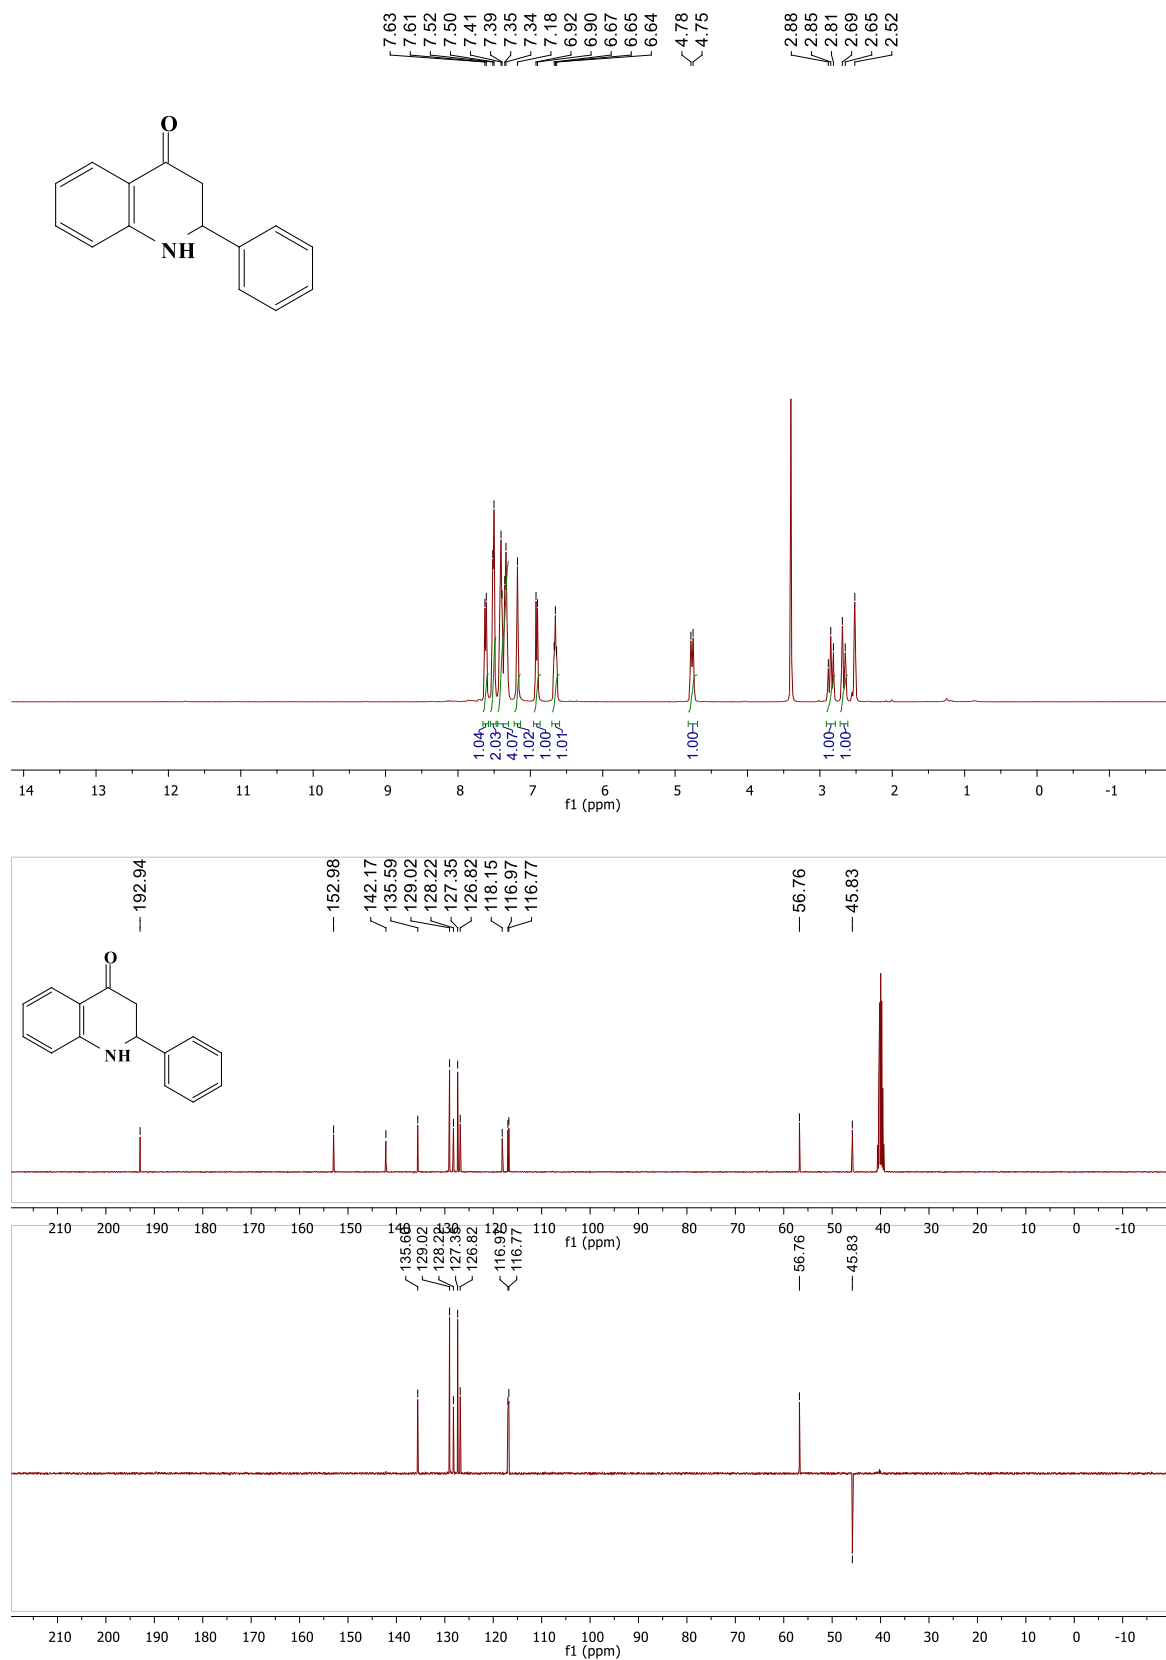

22f

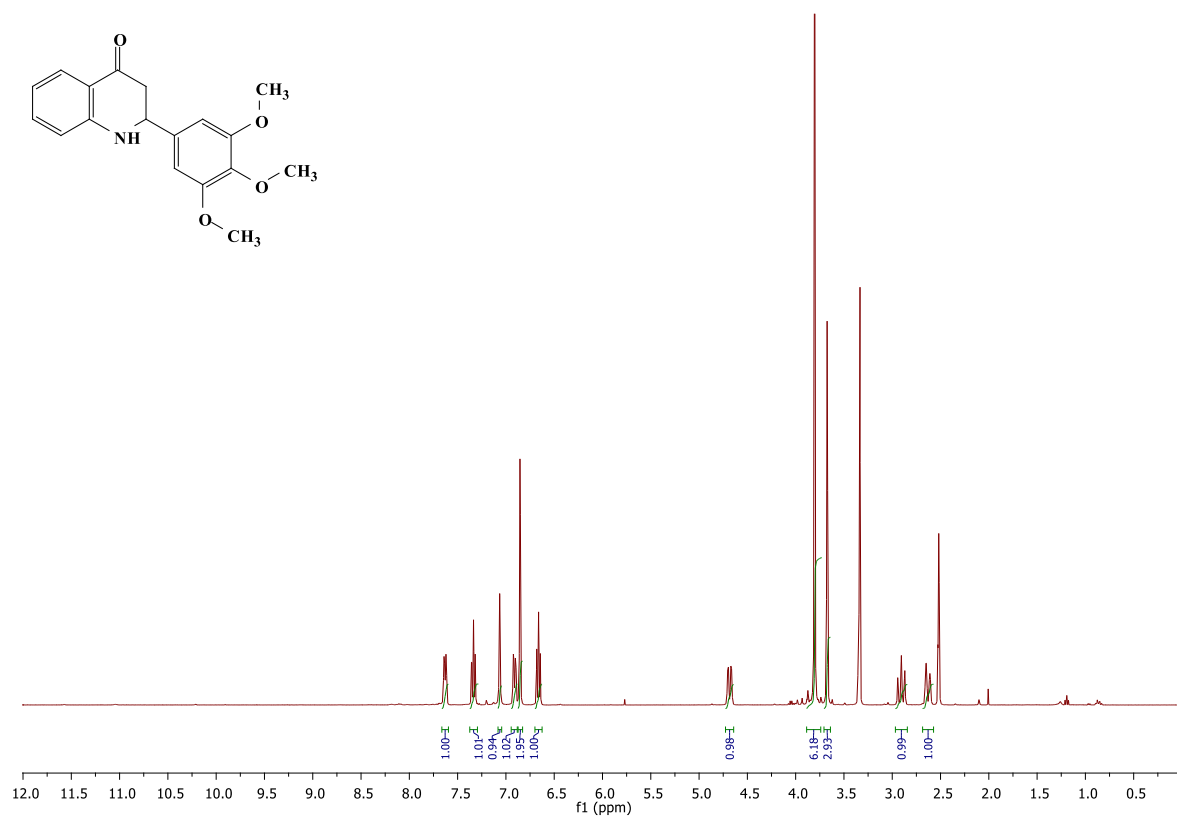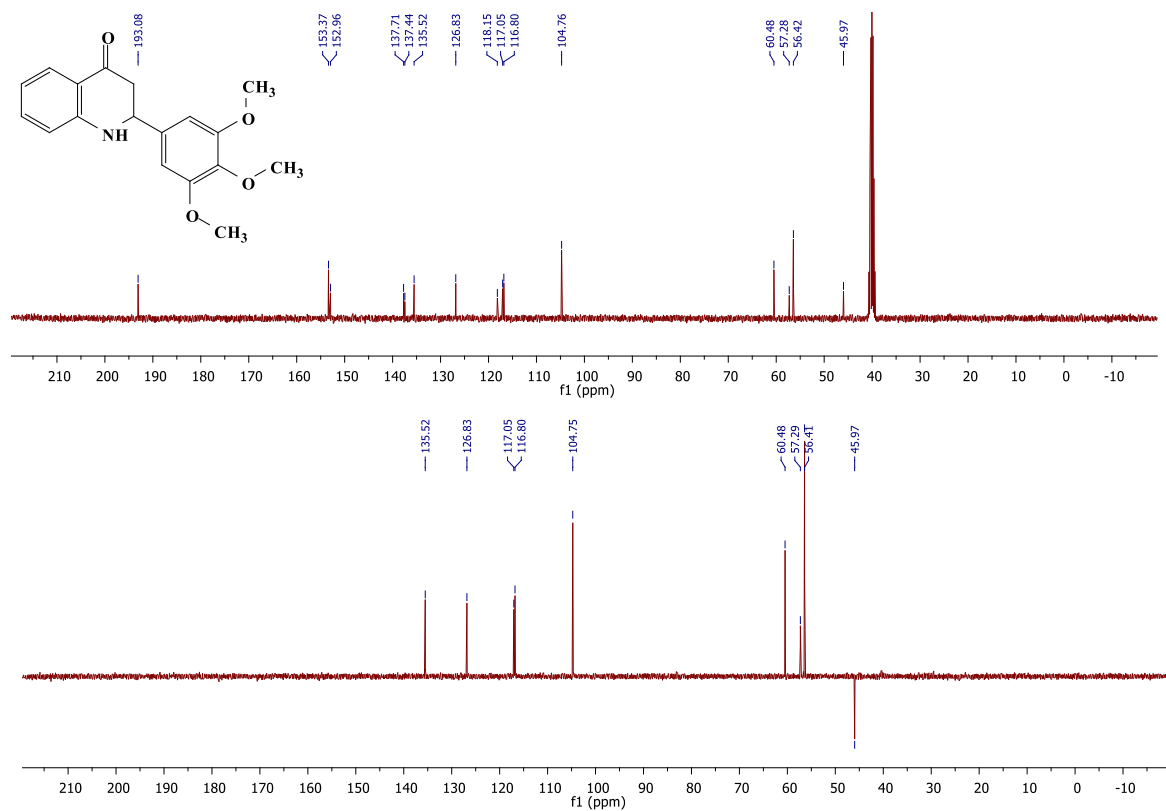

22g

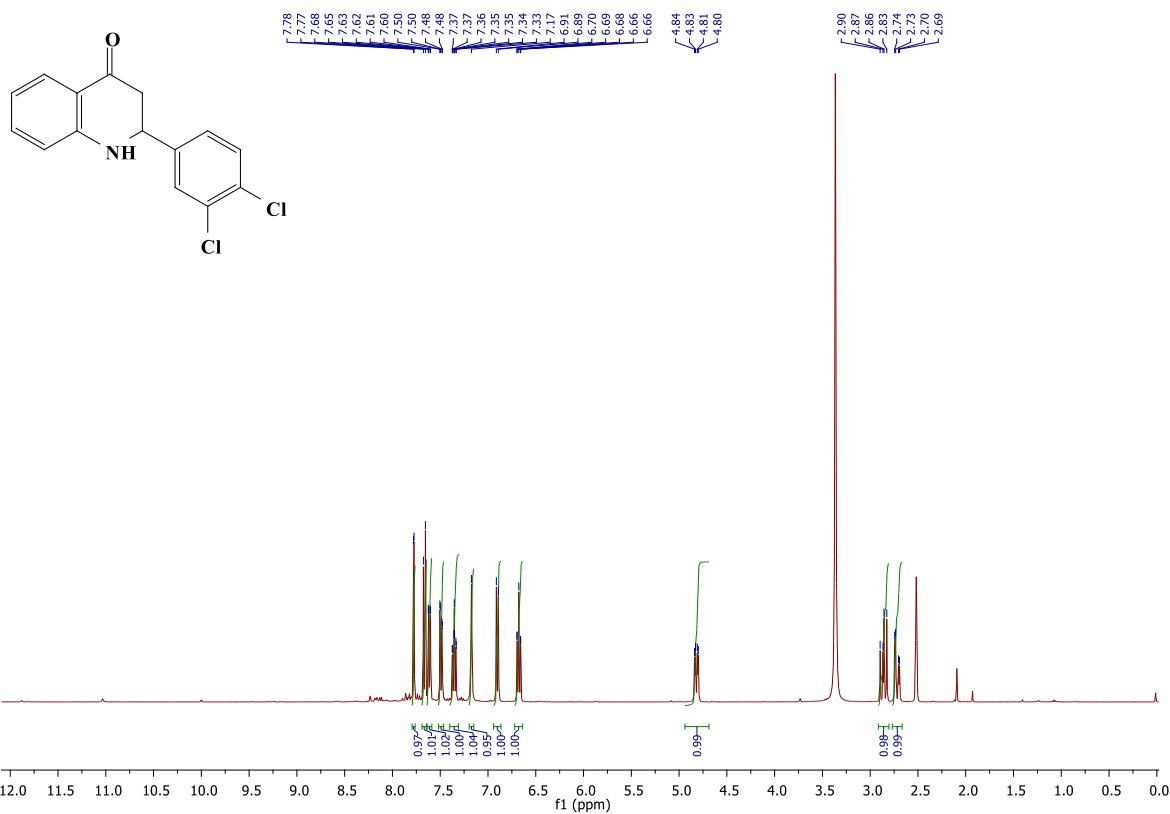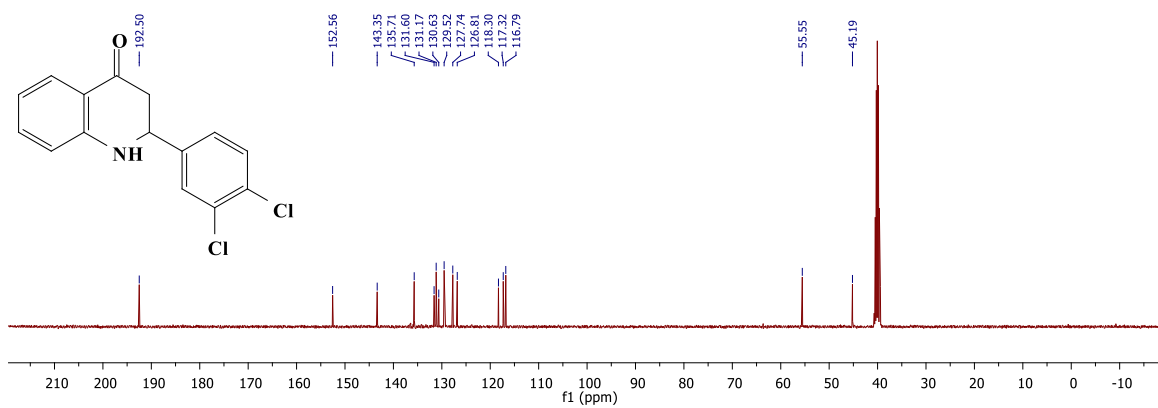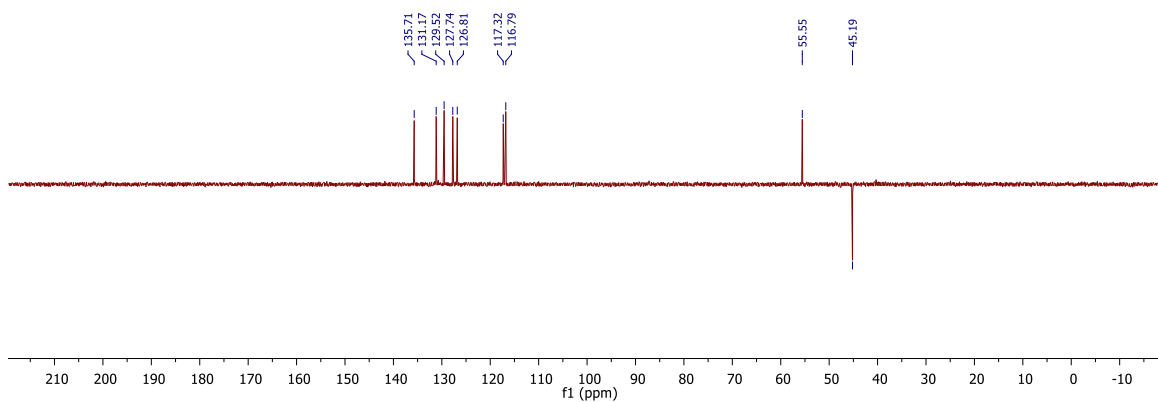



22h

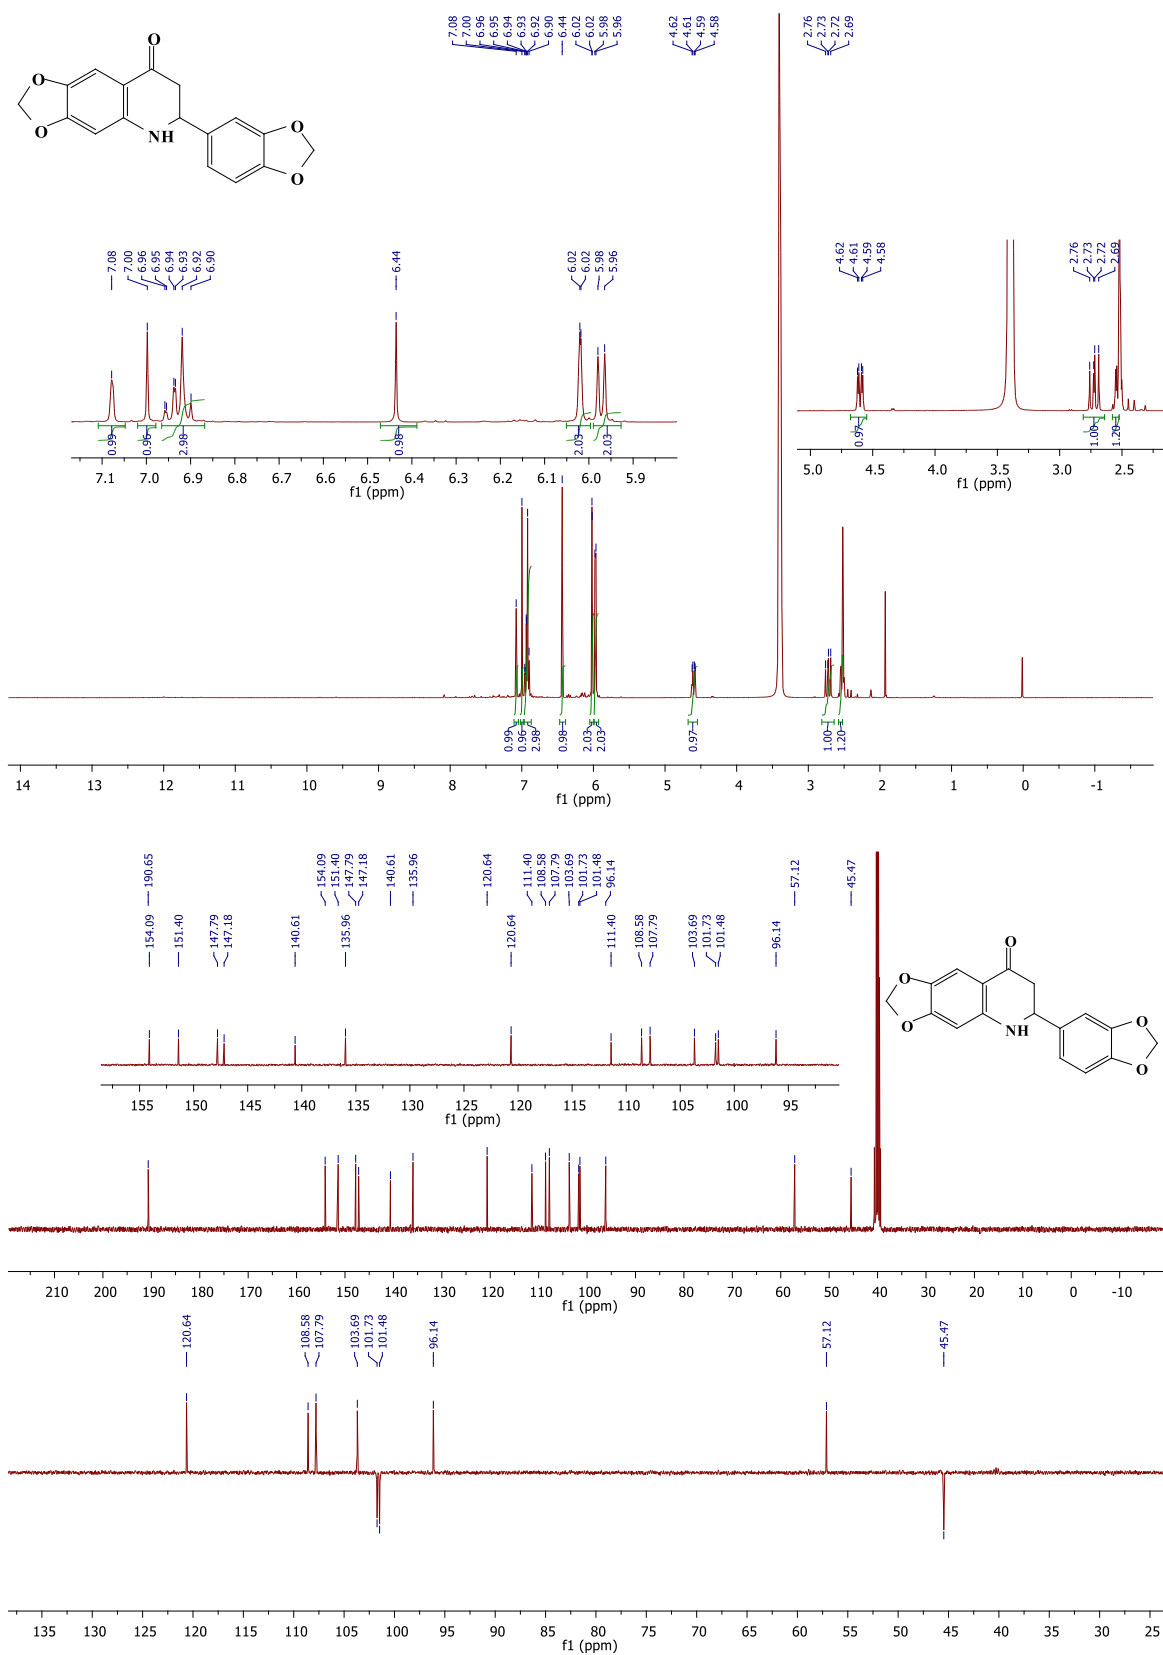

22i

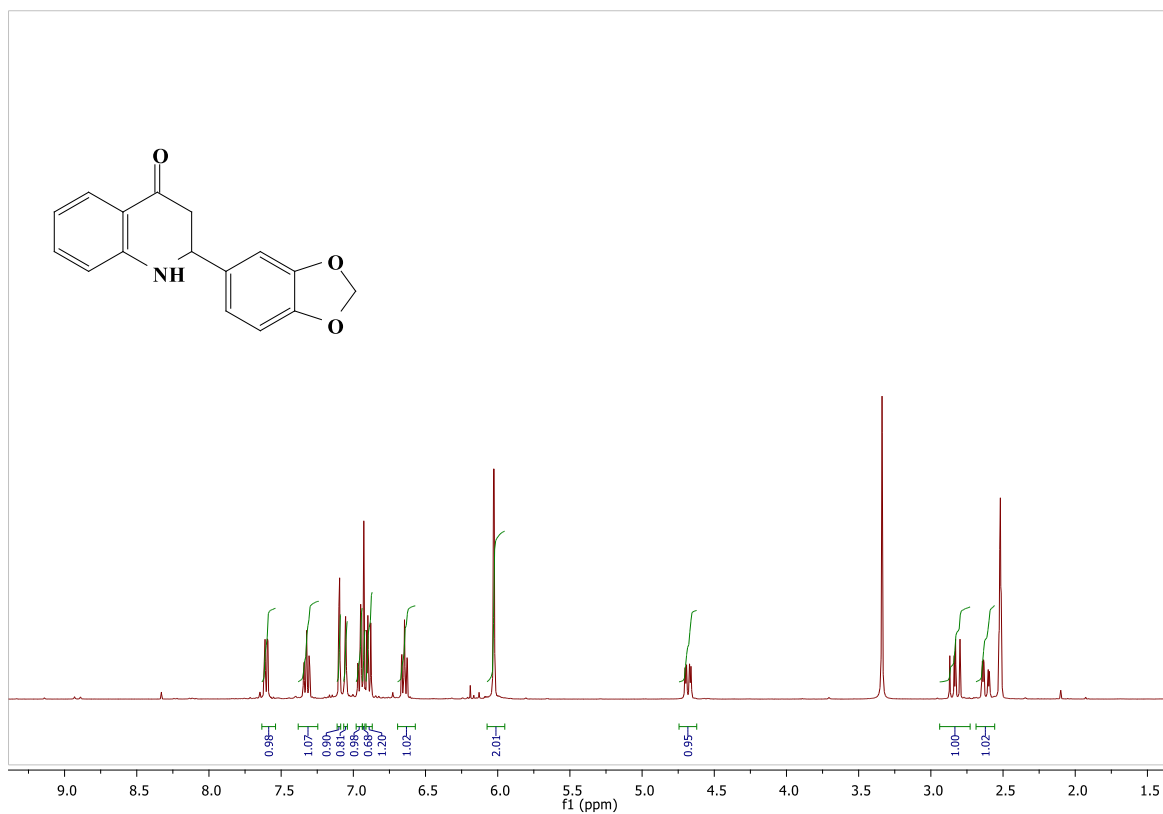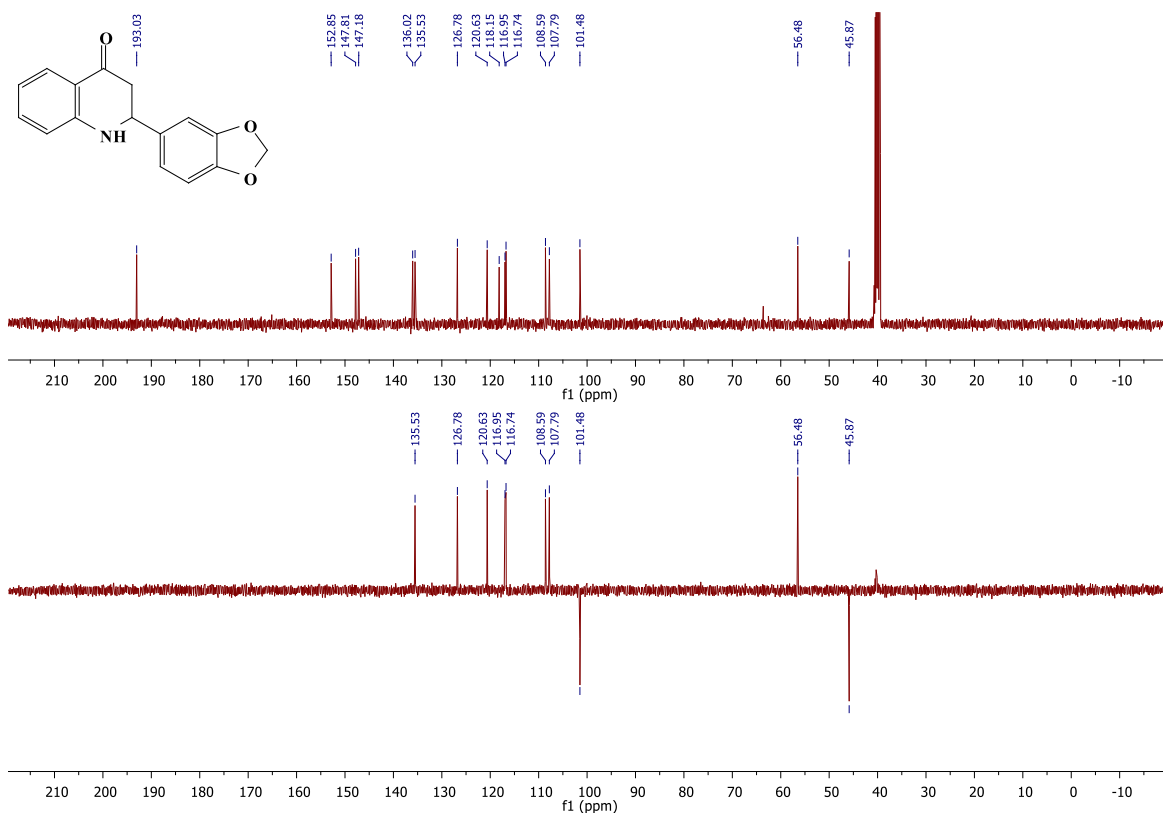

23a

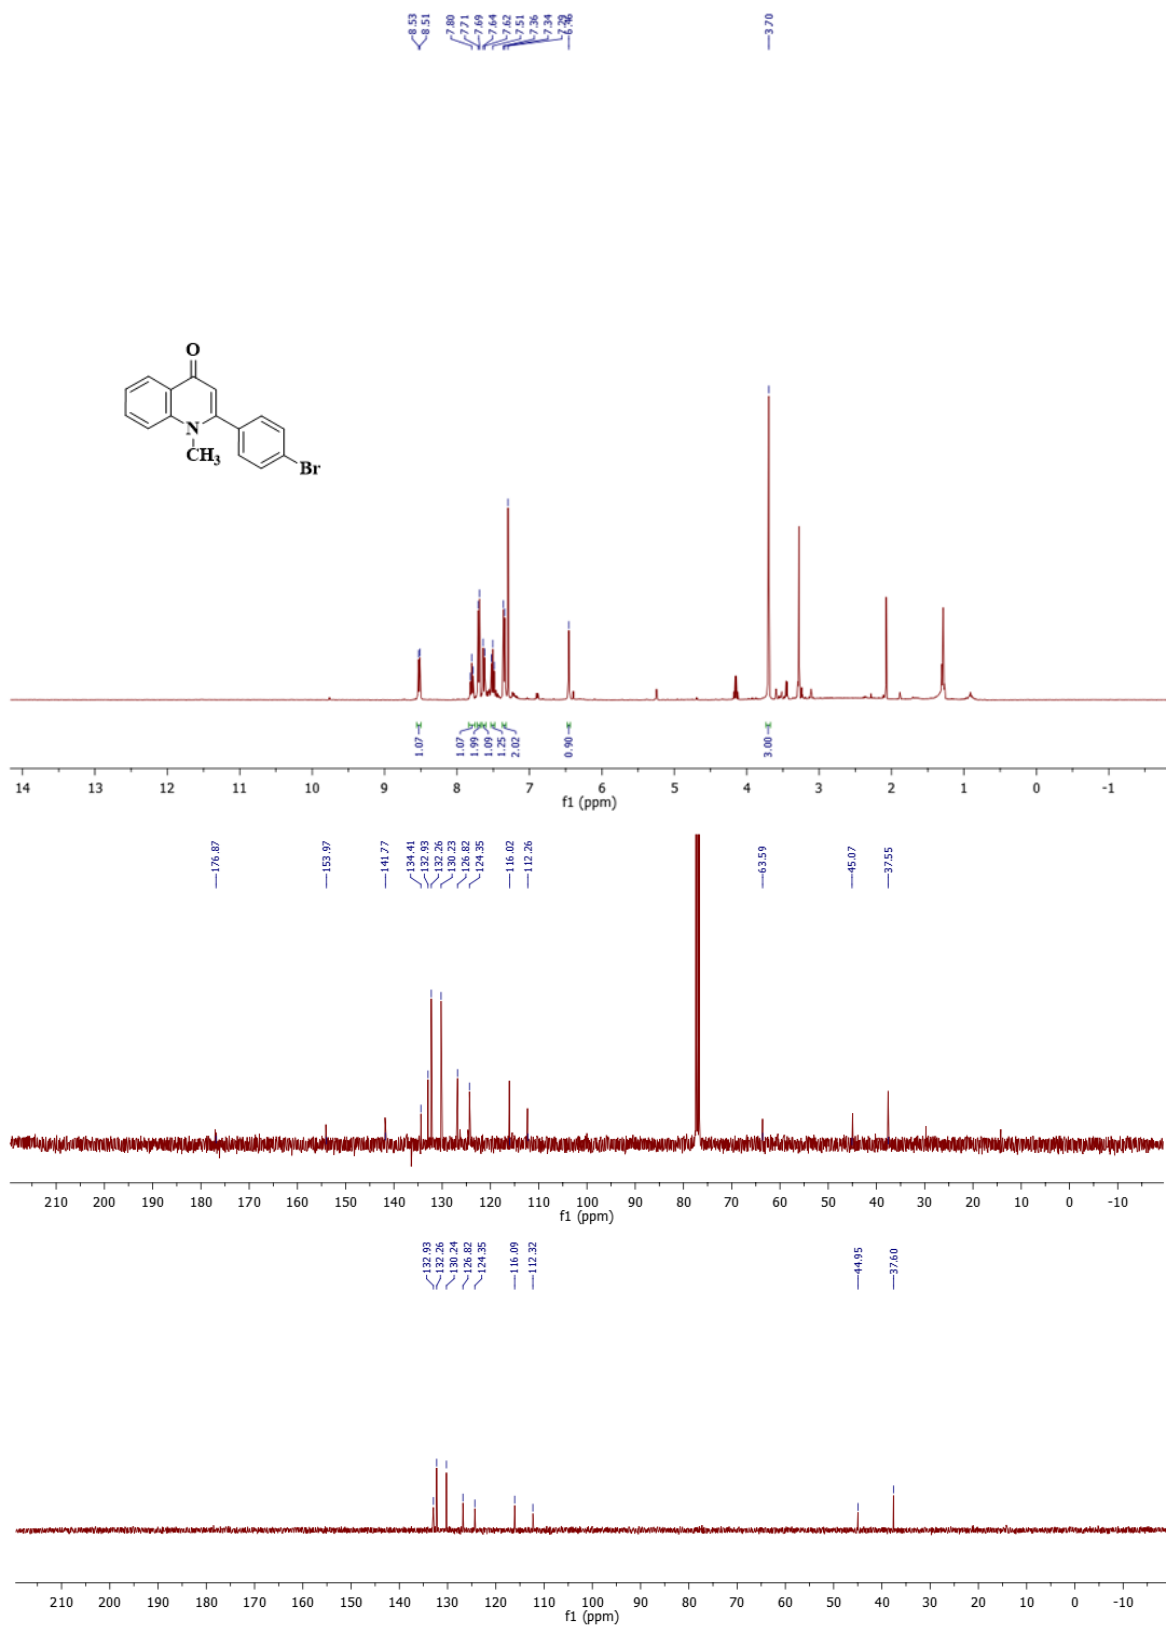

23b

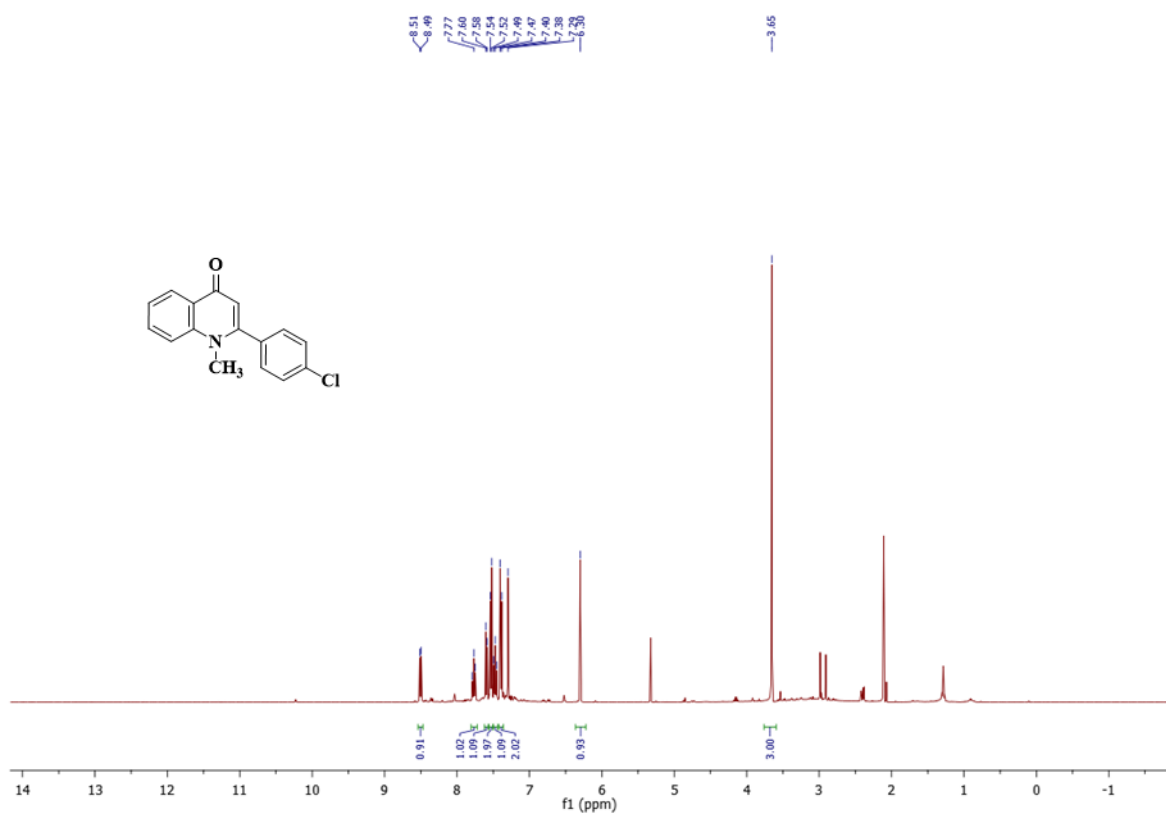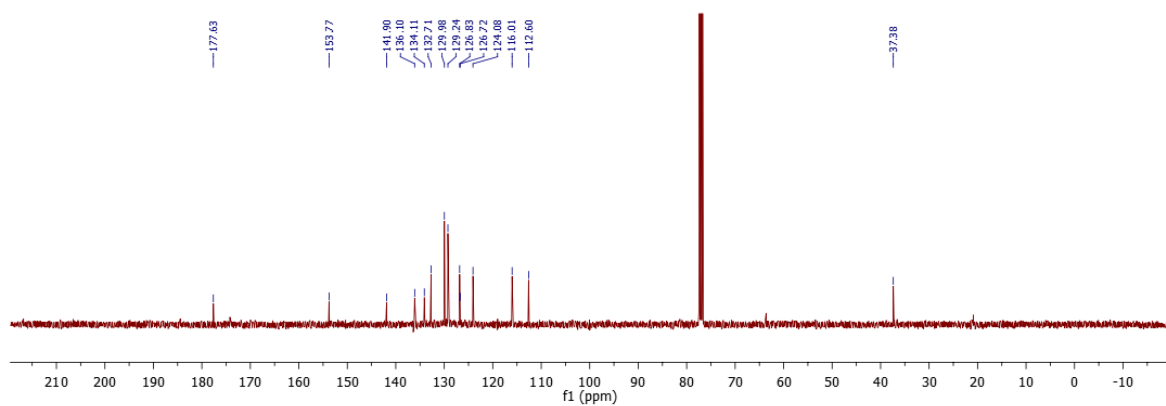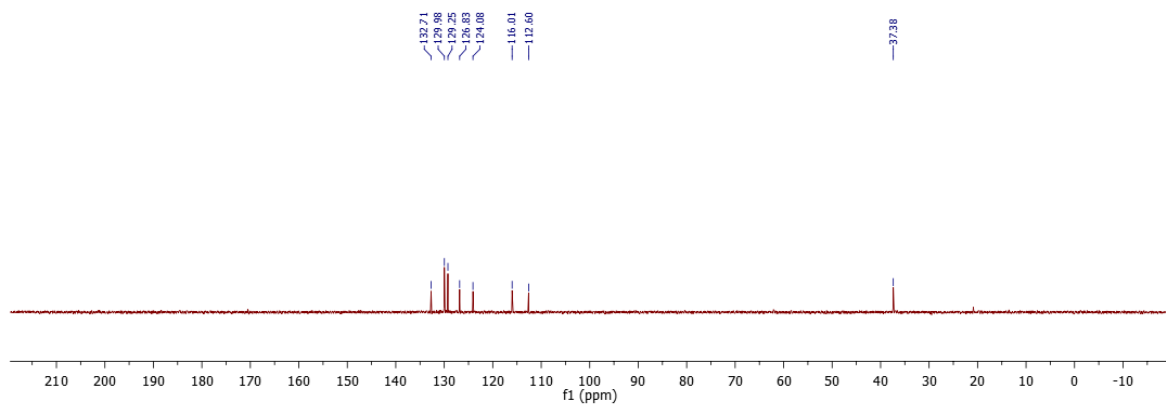

23c

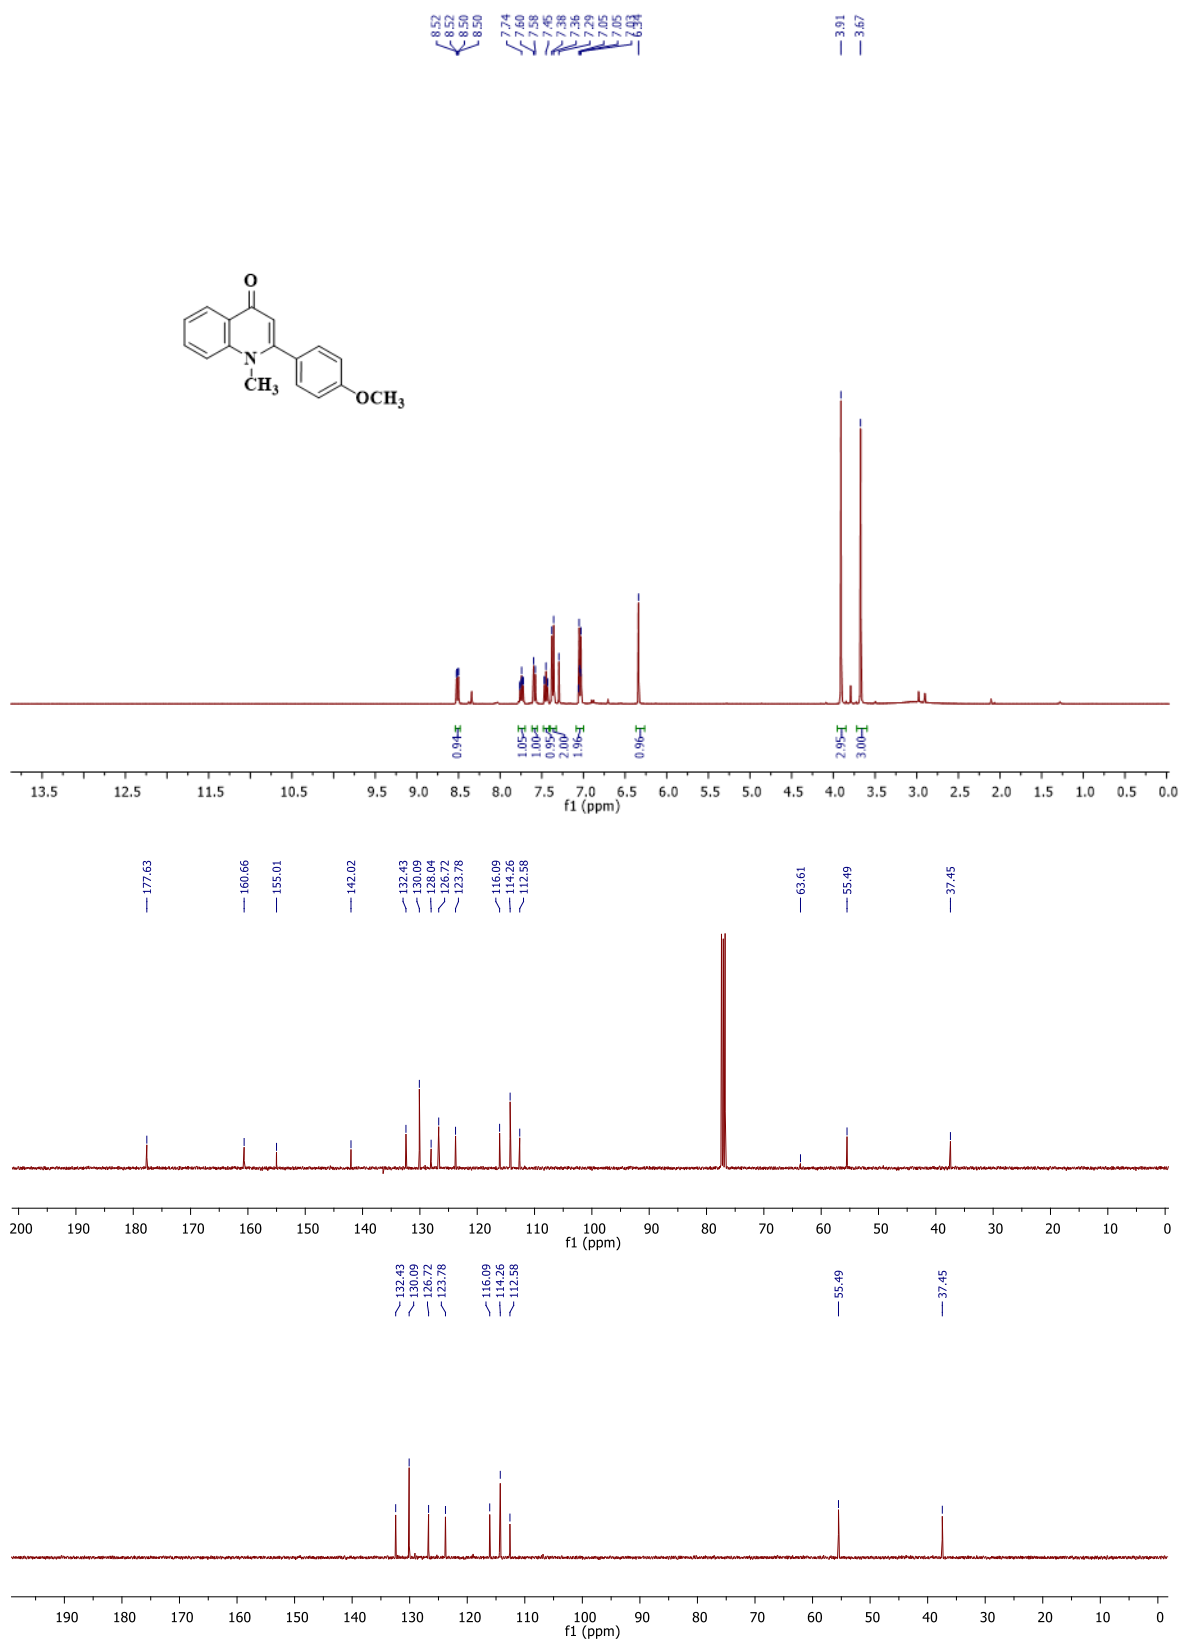

23d

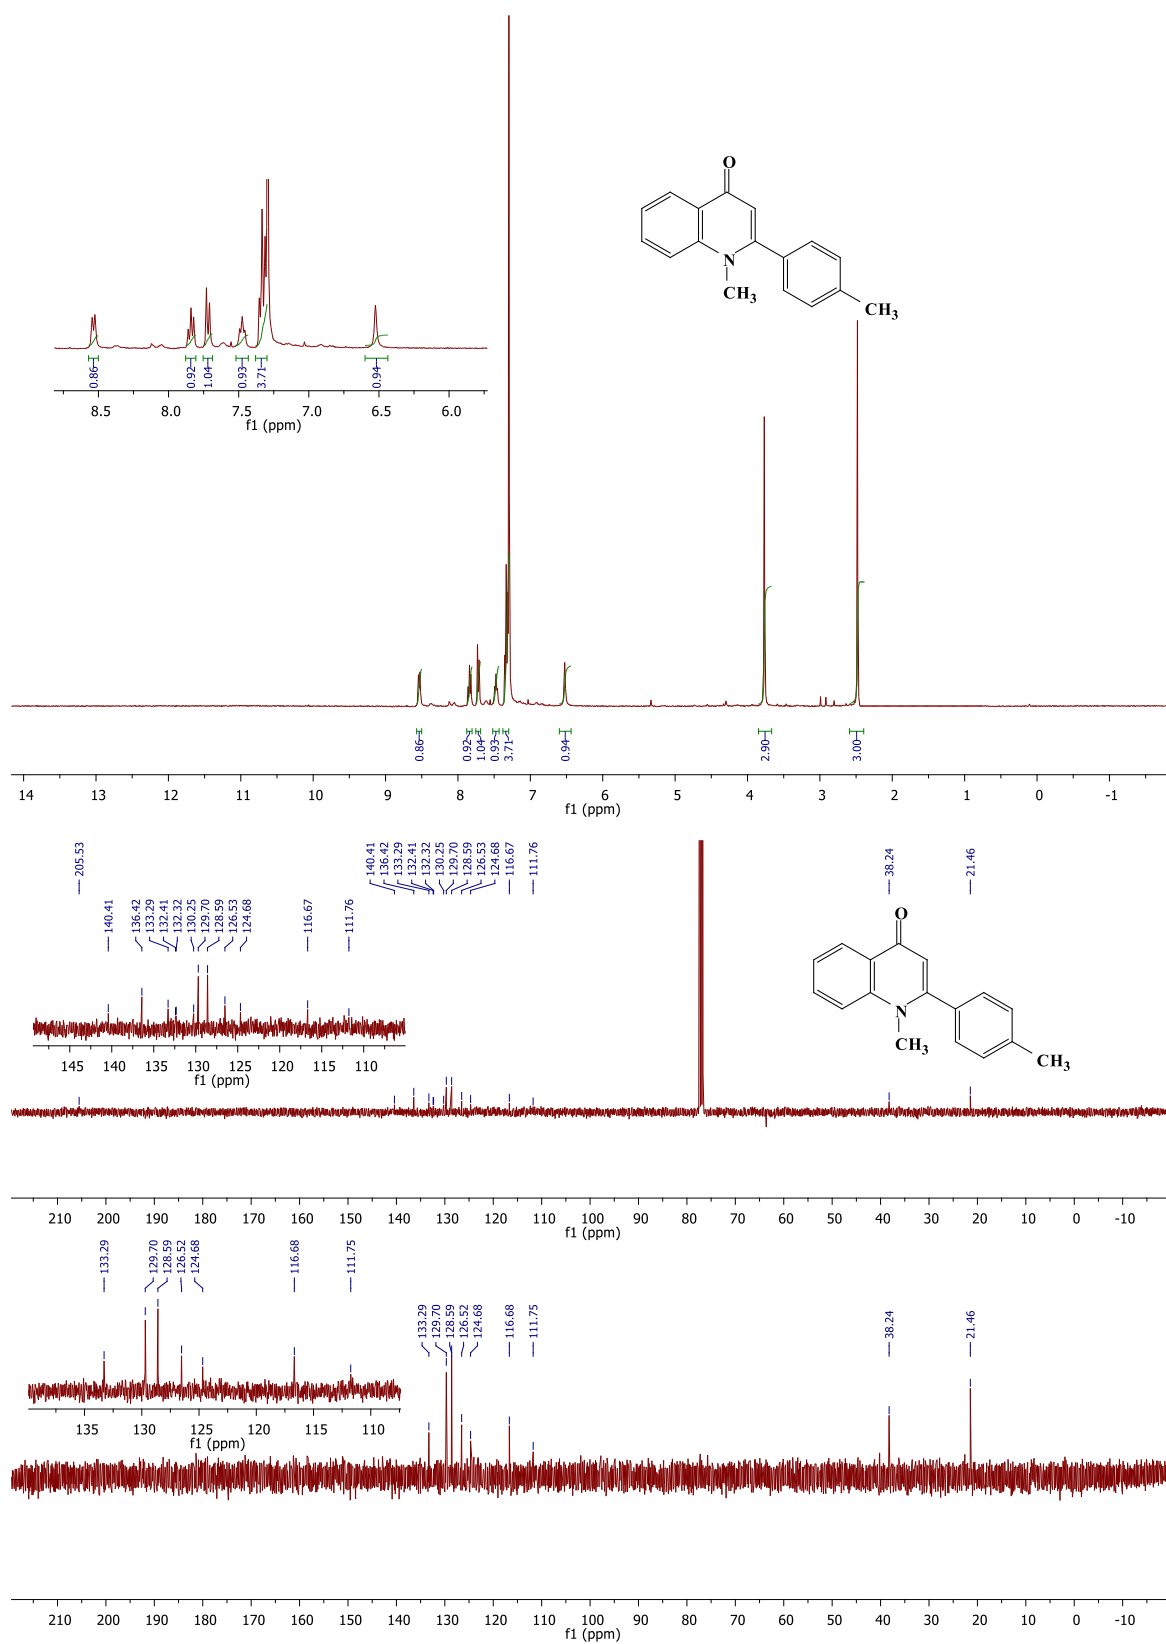

23e

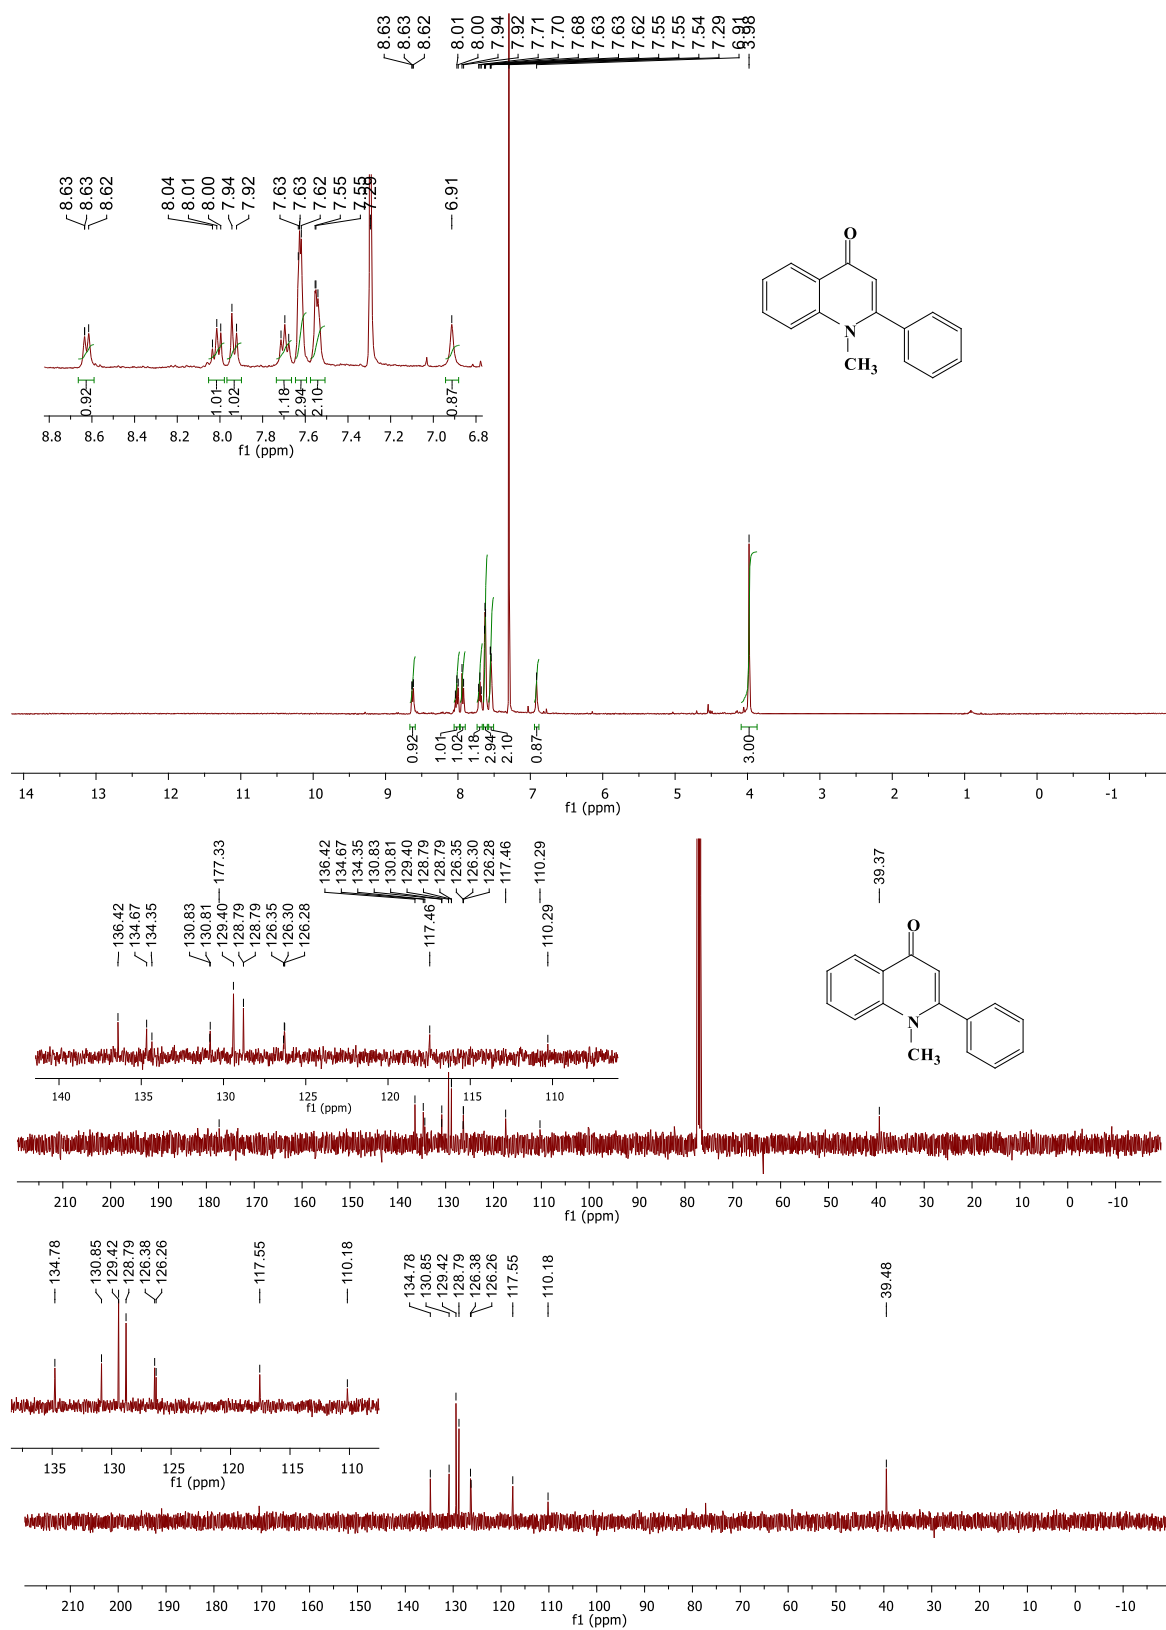

23f

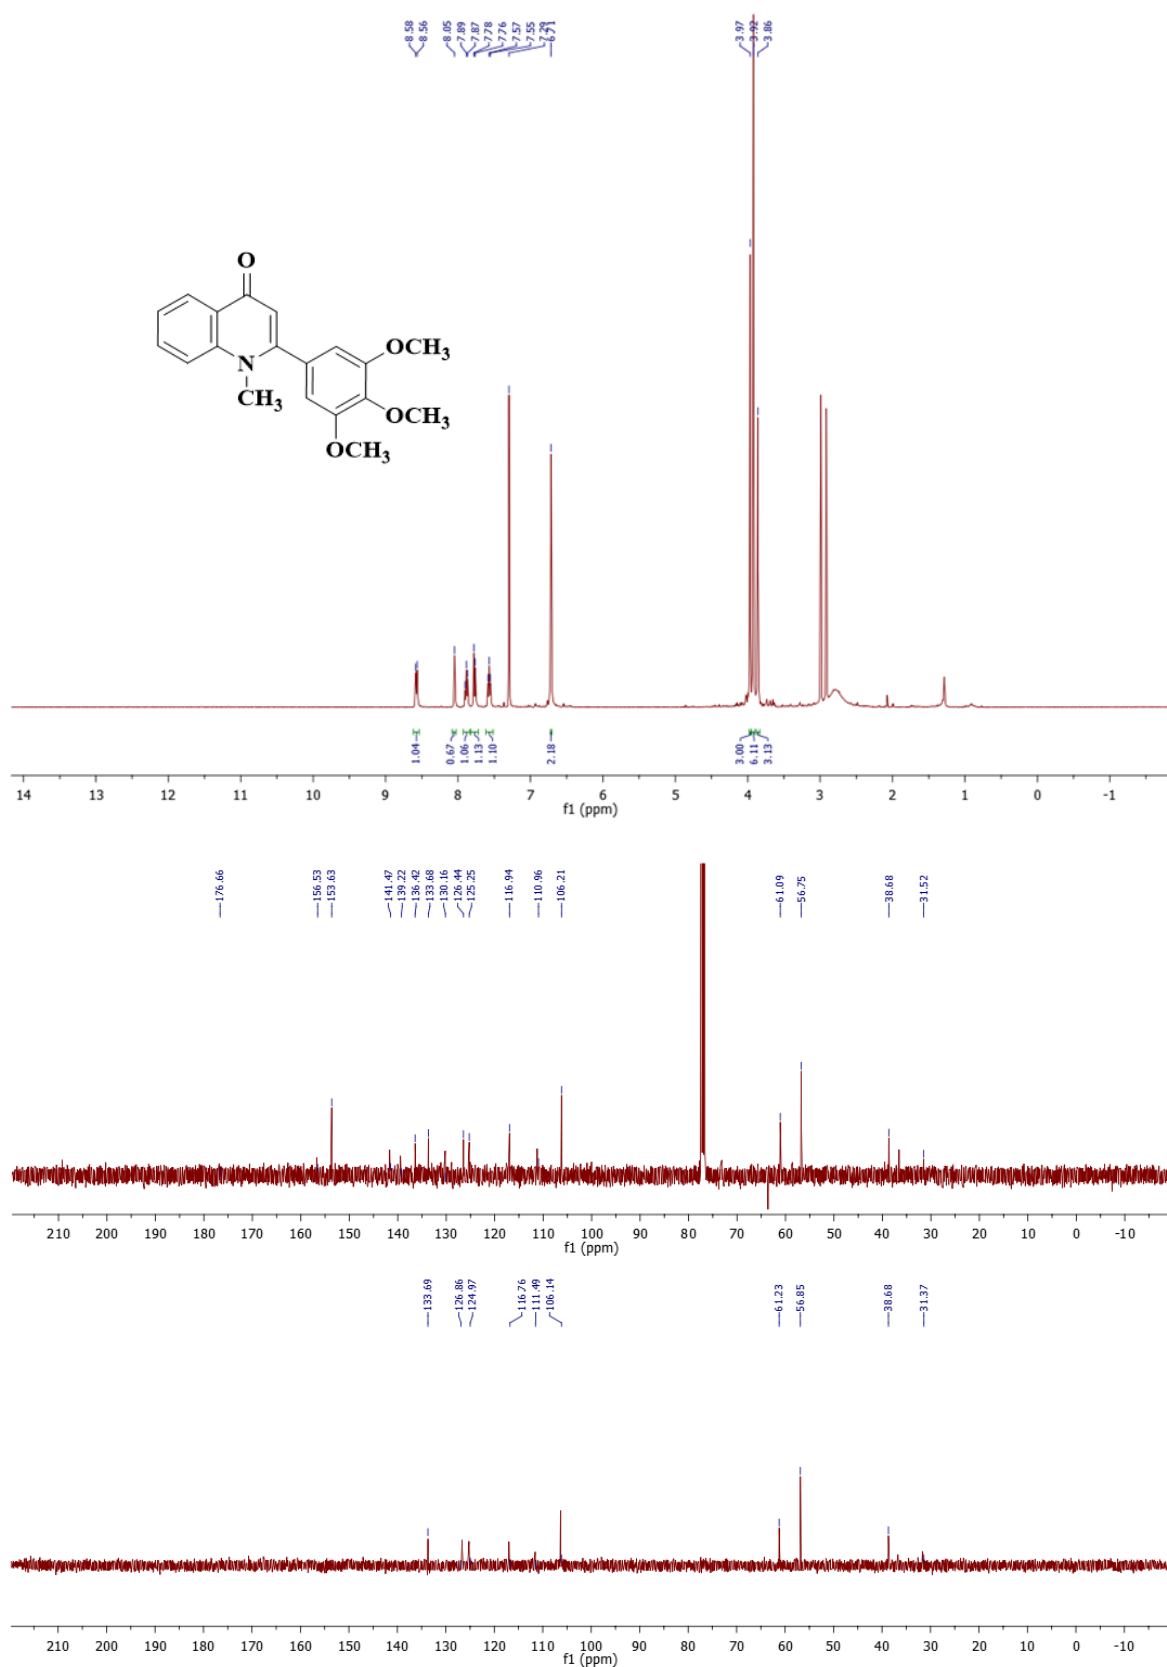



23g

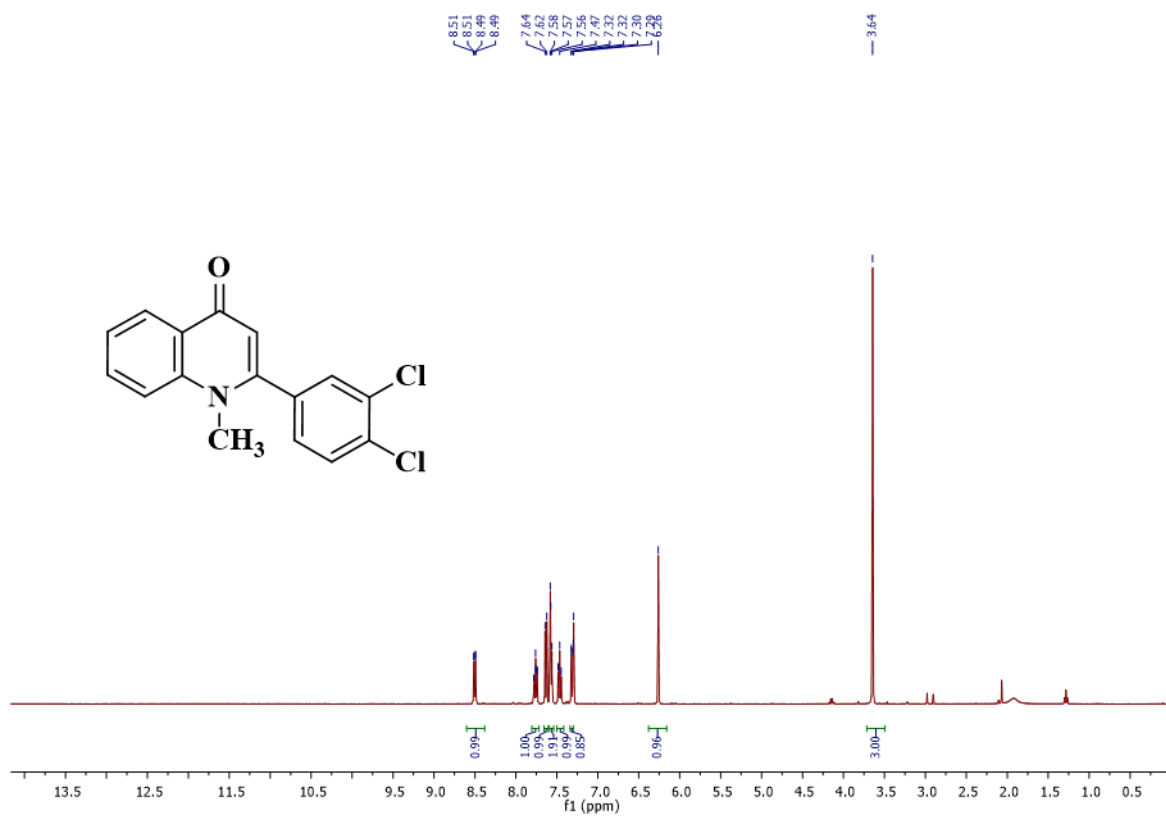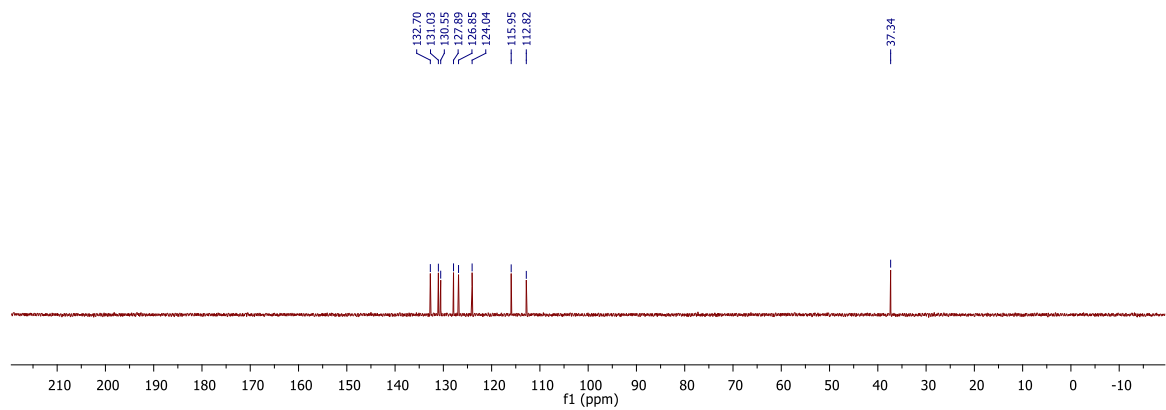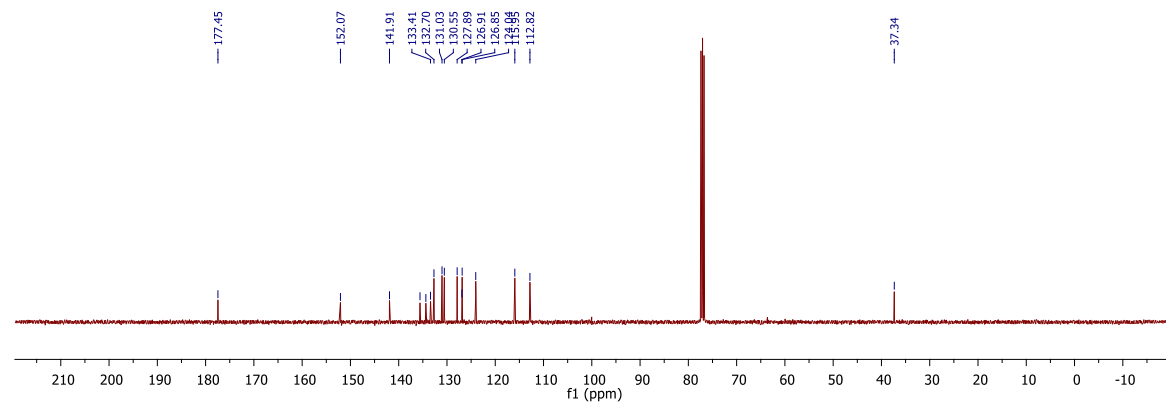

23h

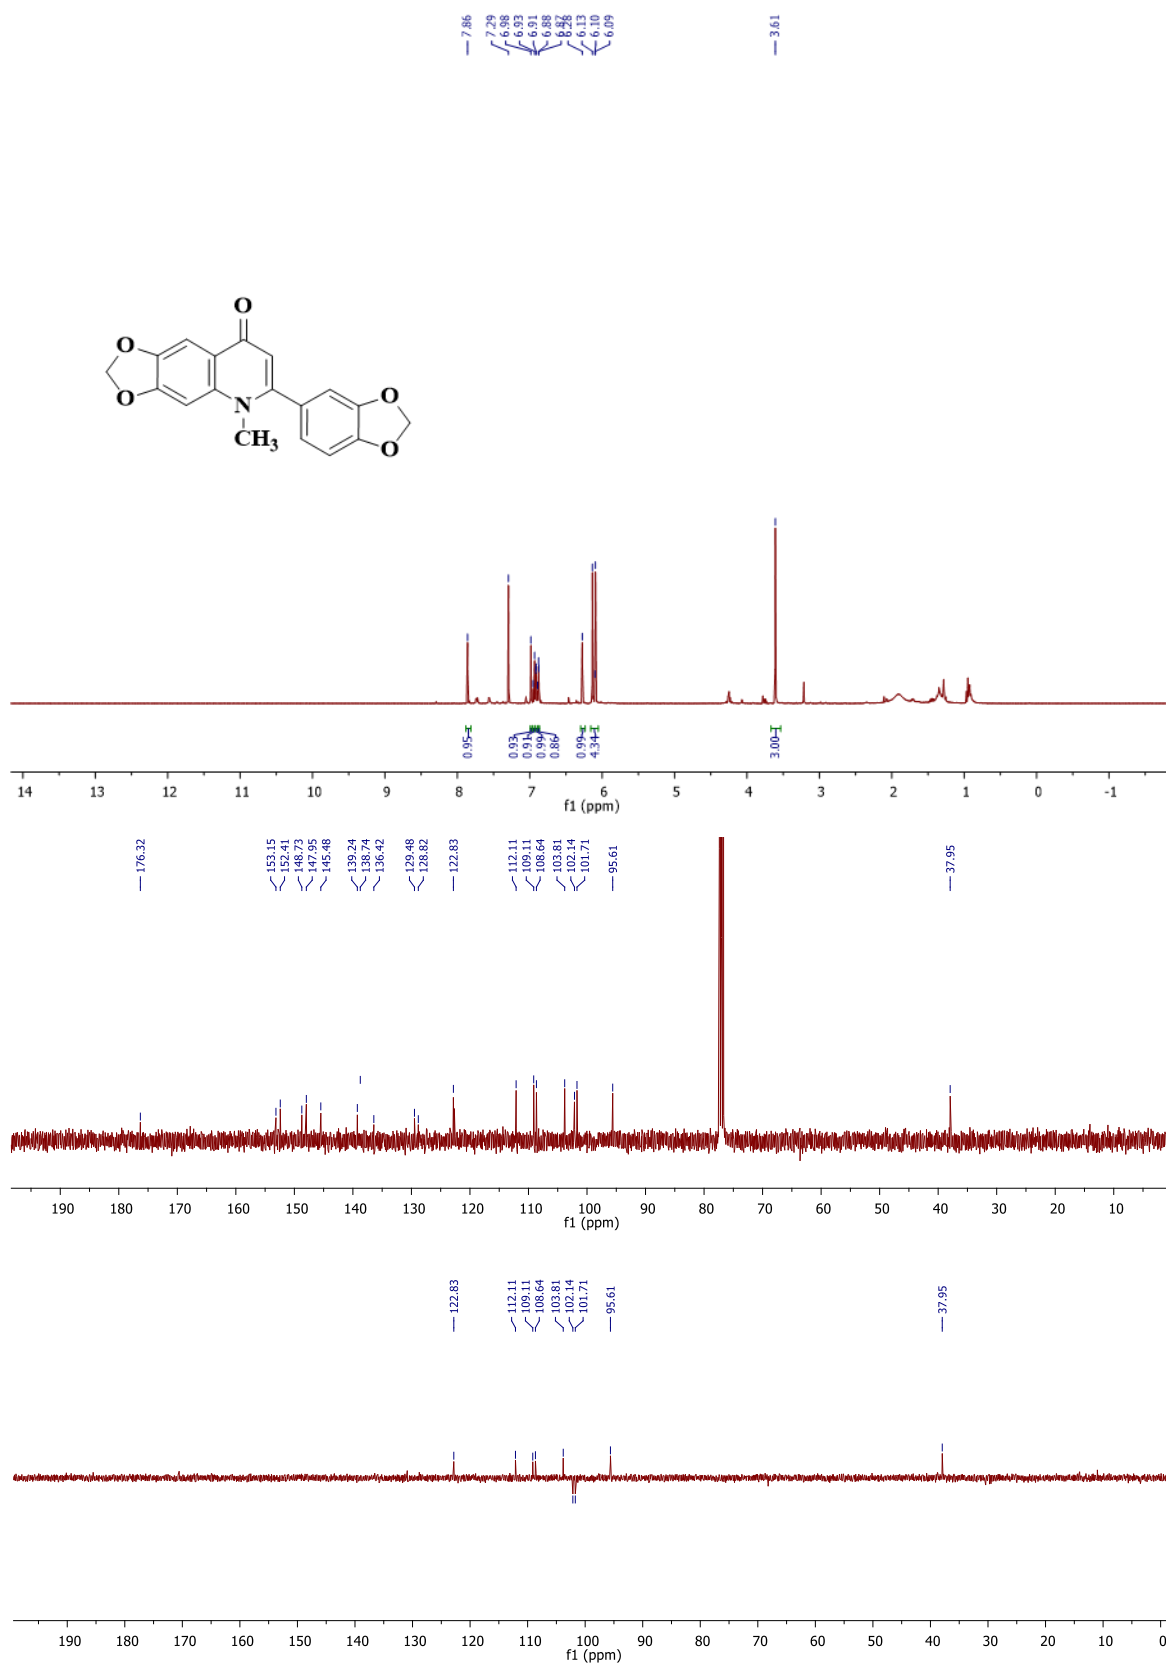

# Graveoline 1

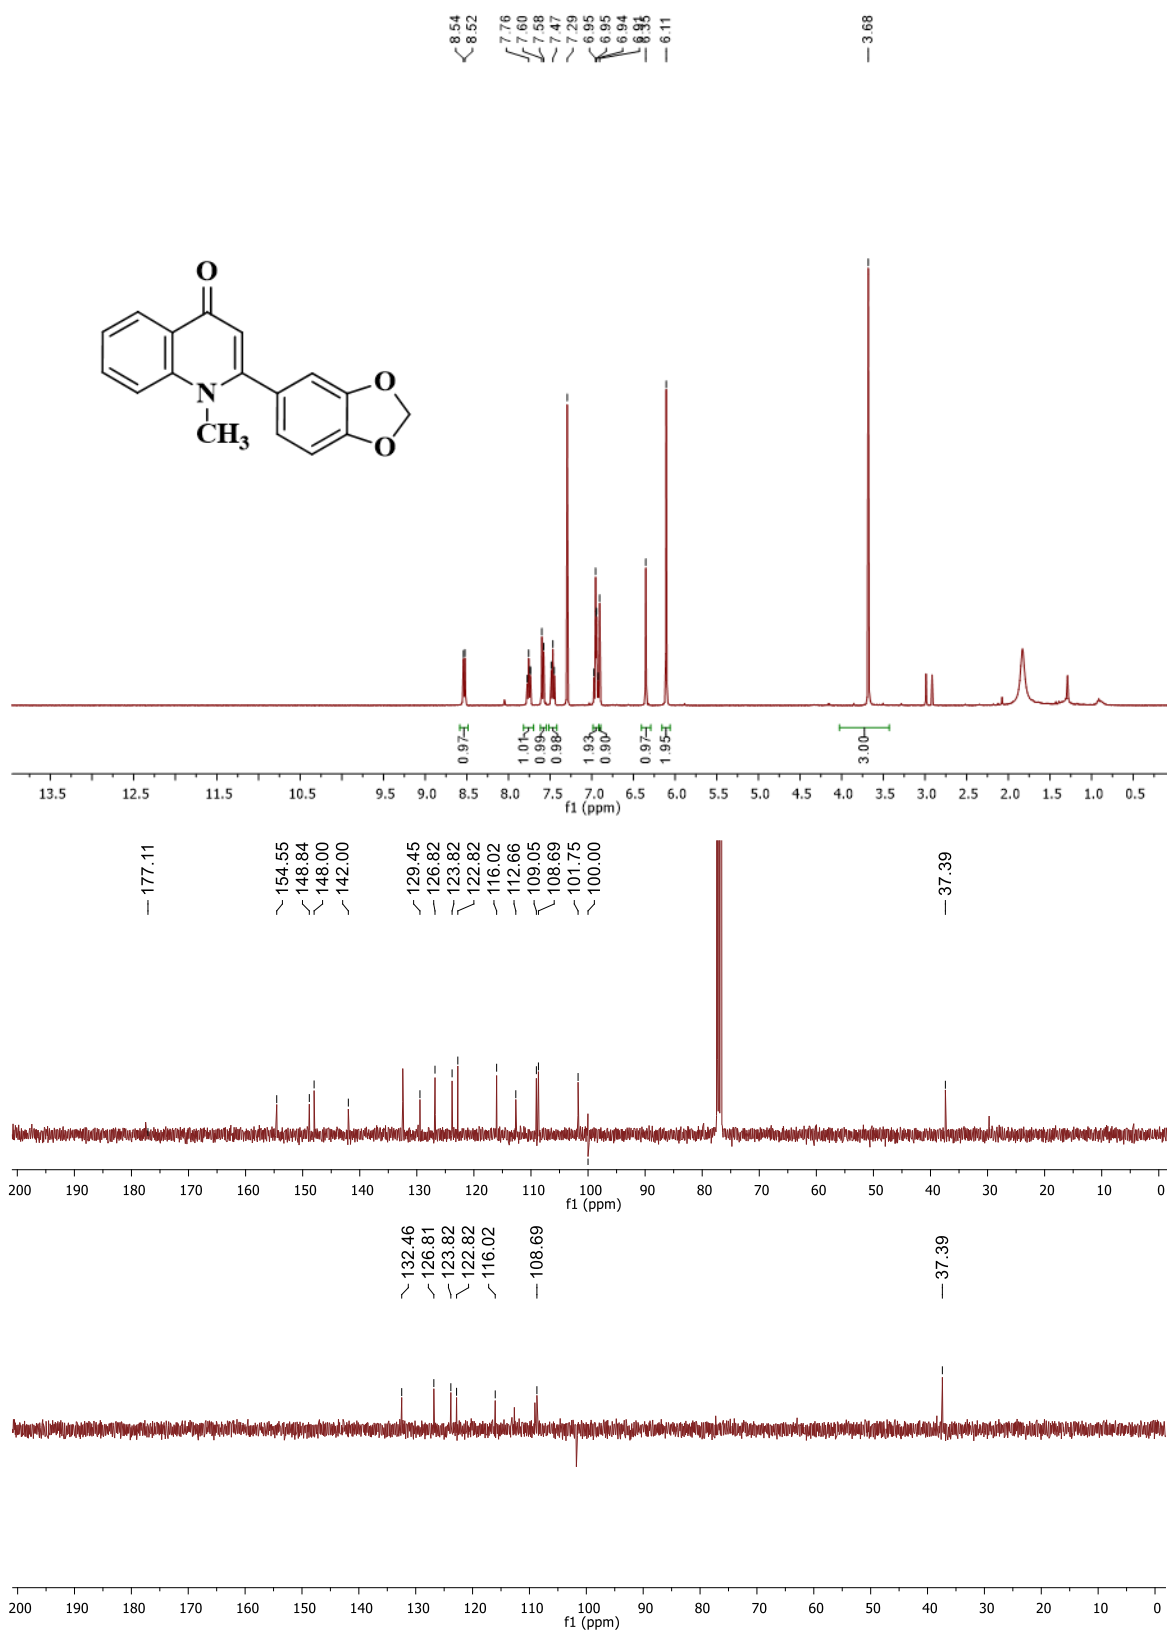

24a

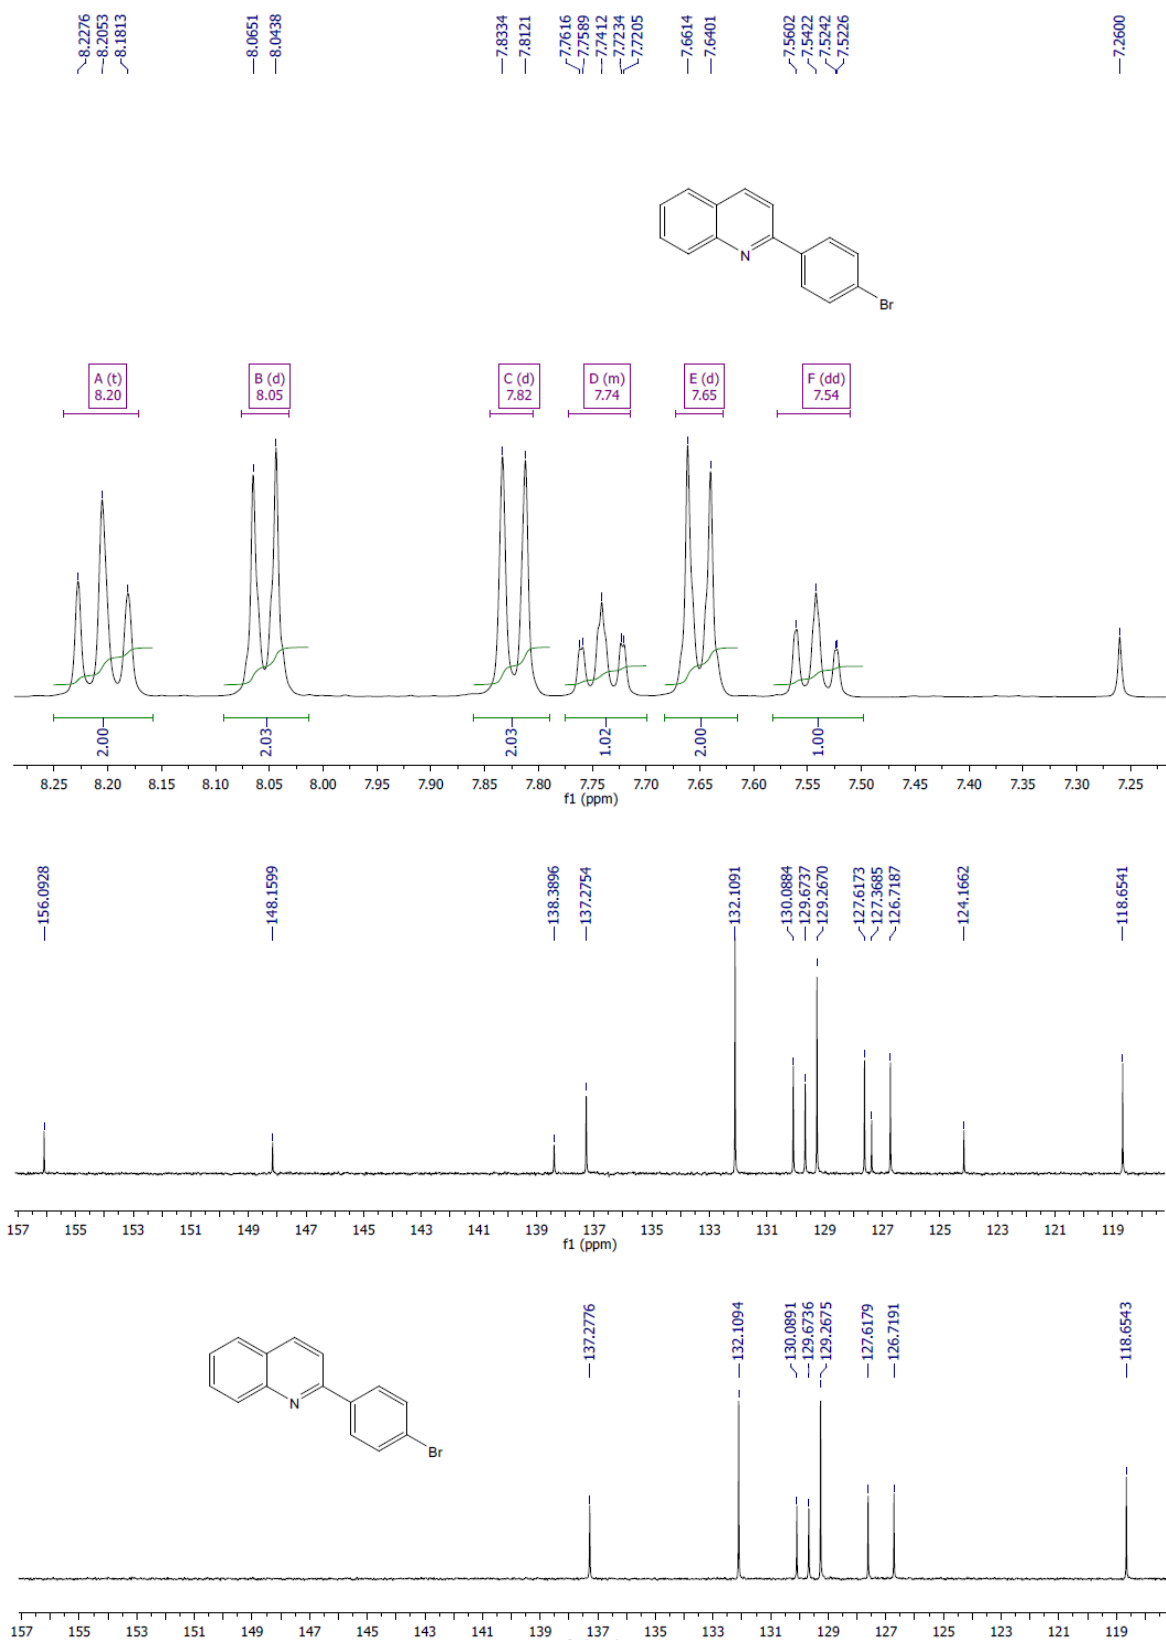

24b

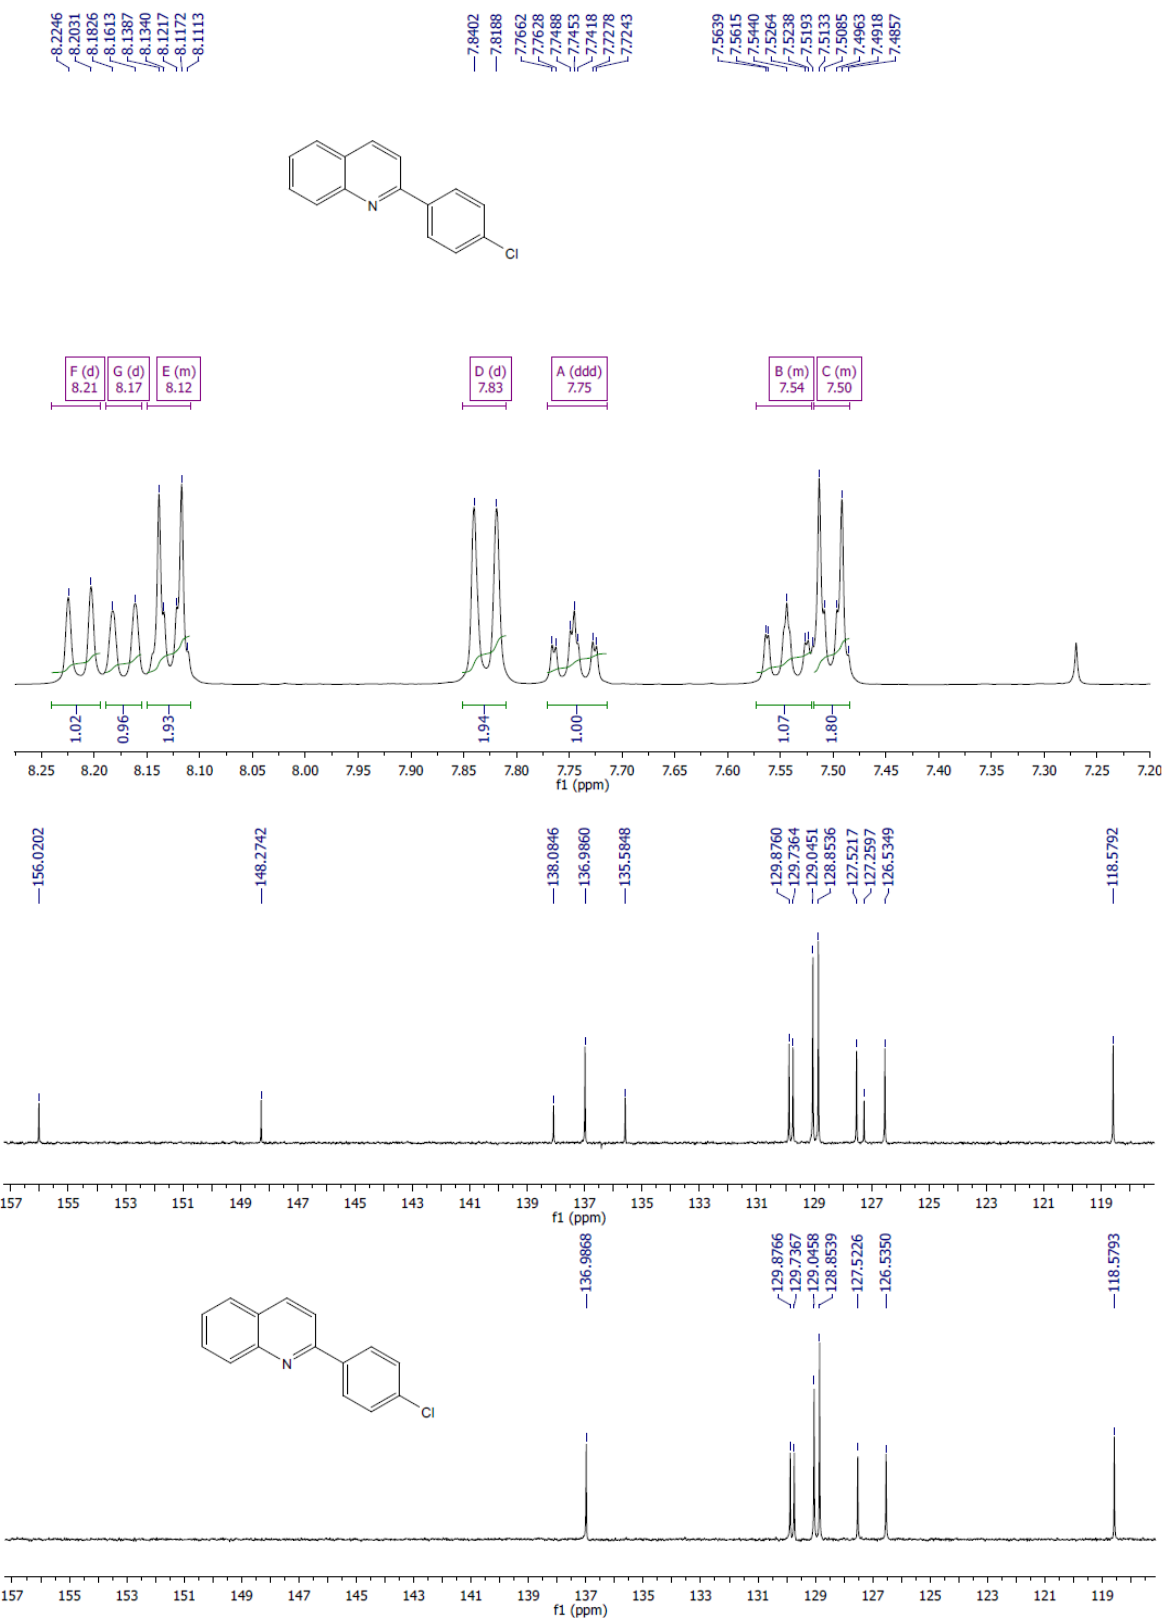

24c

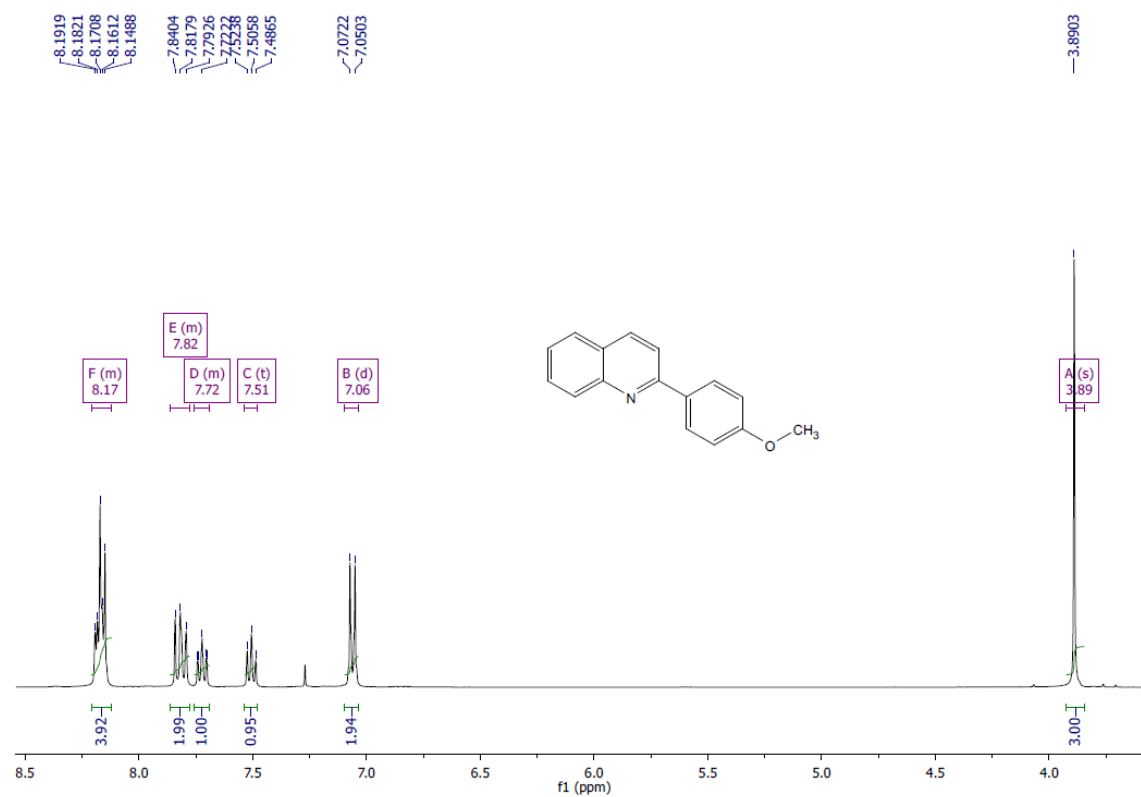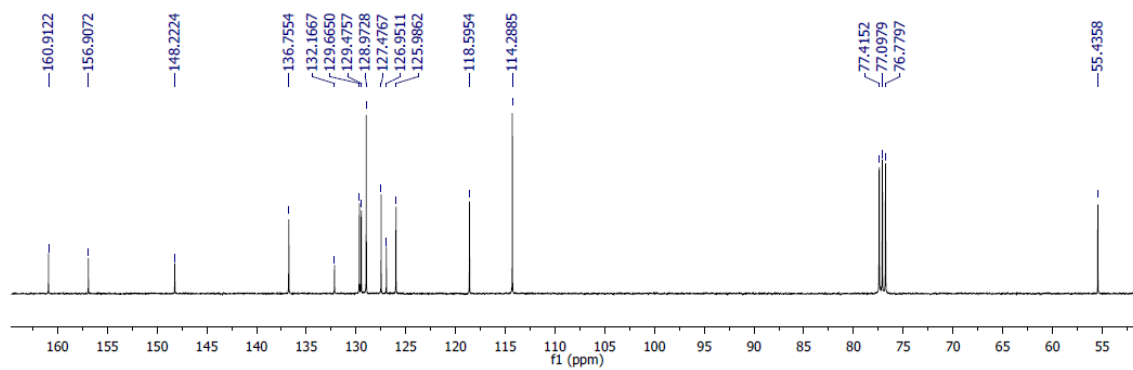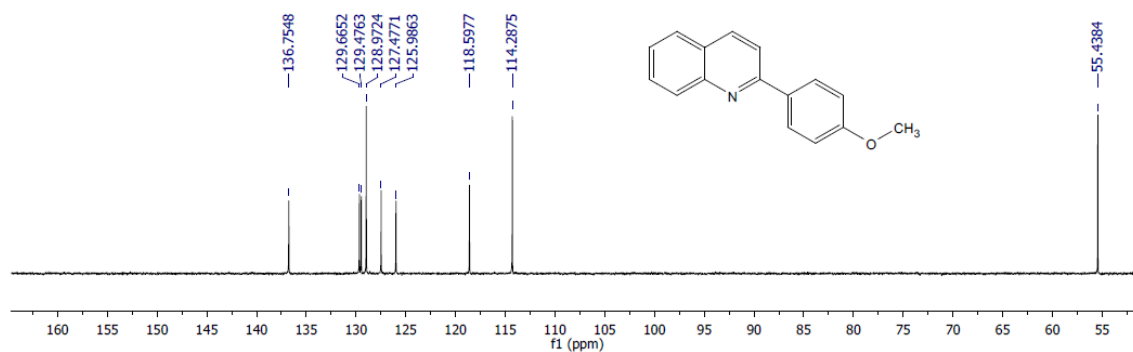

24d

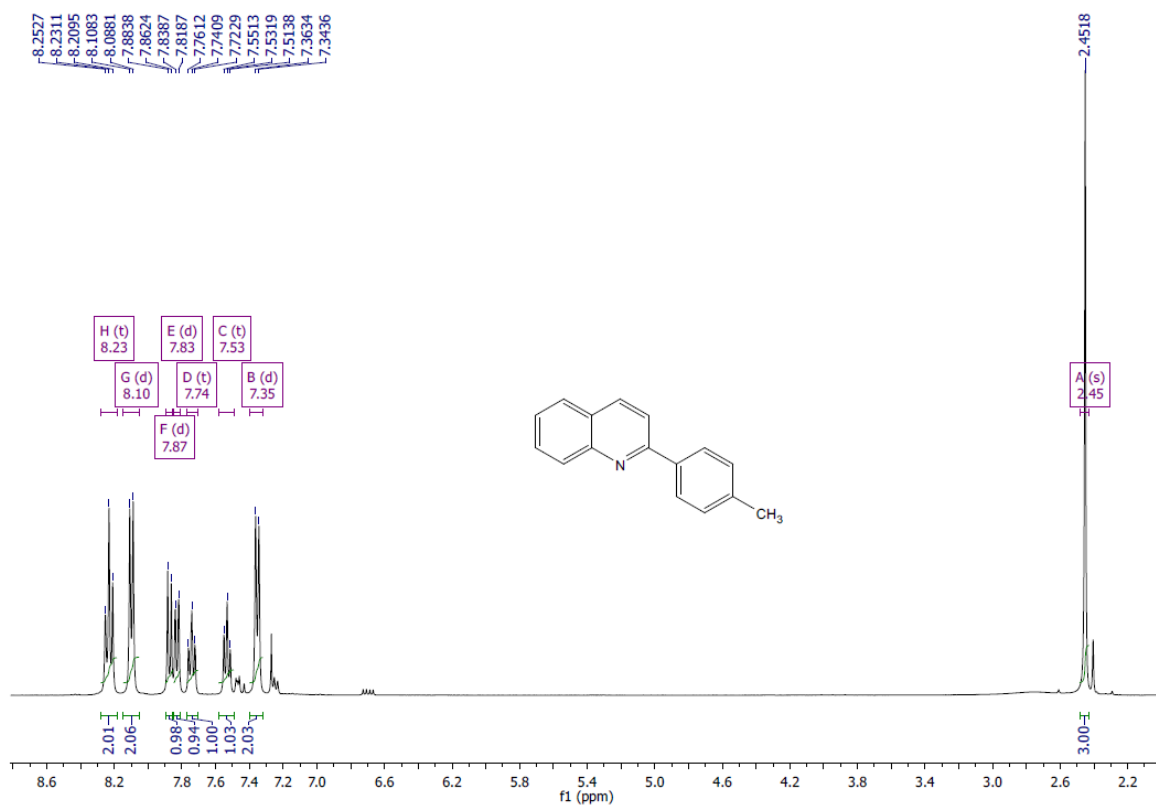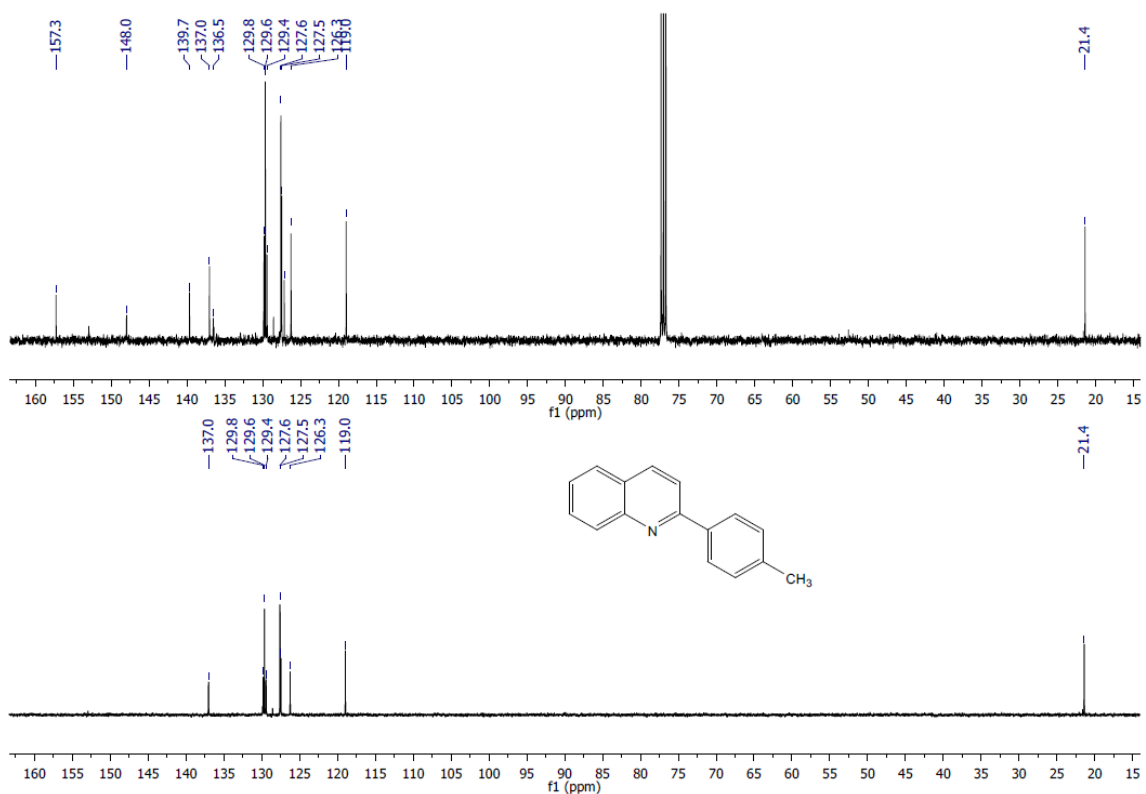

24e

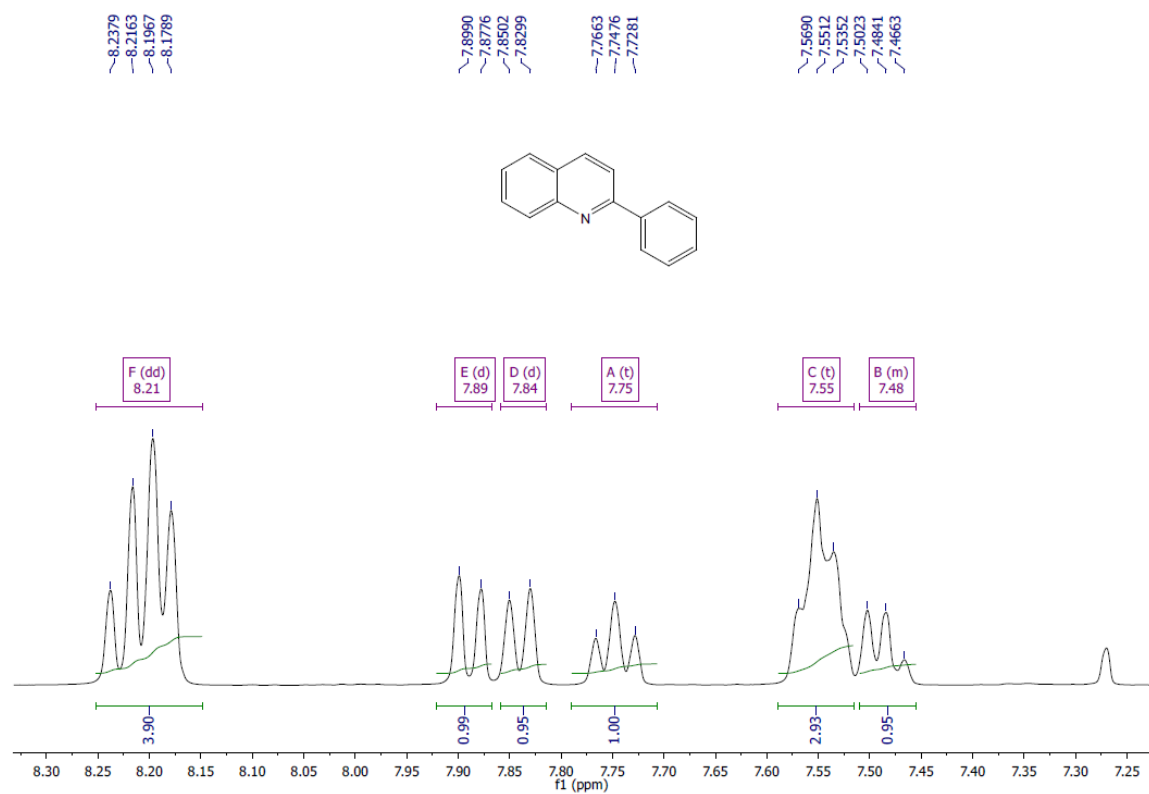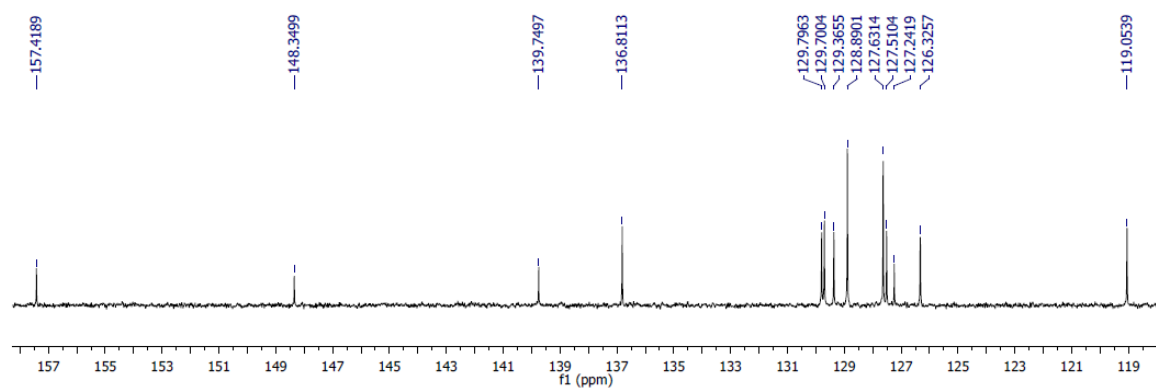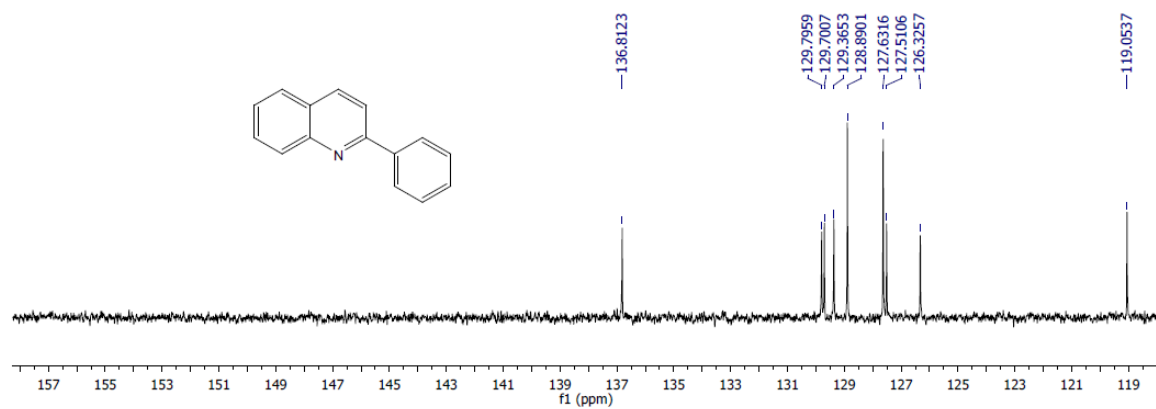



24f

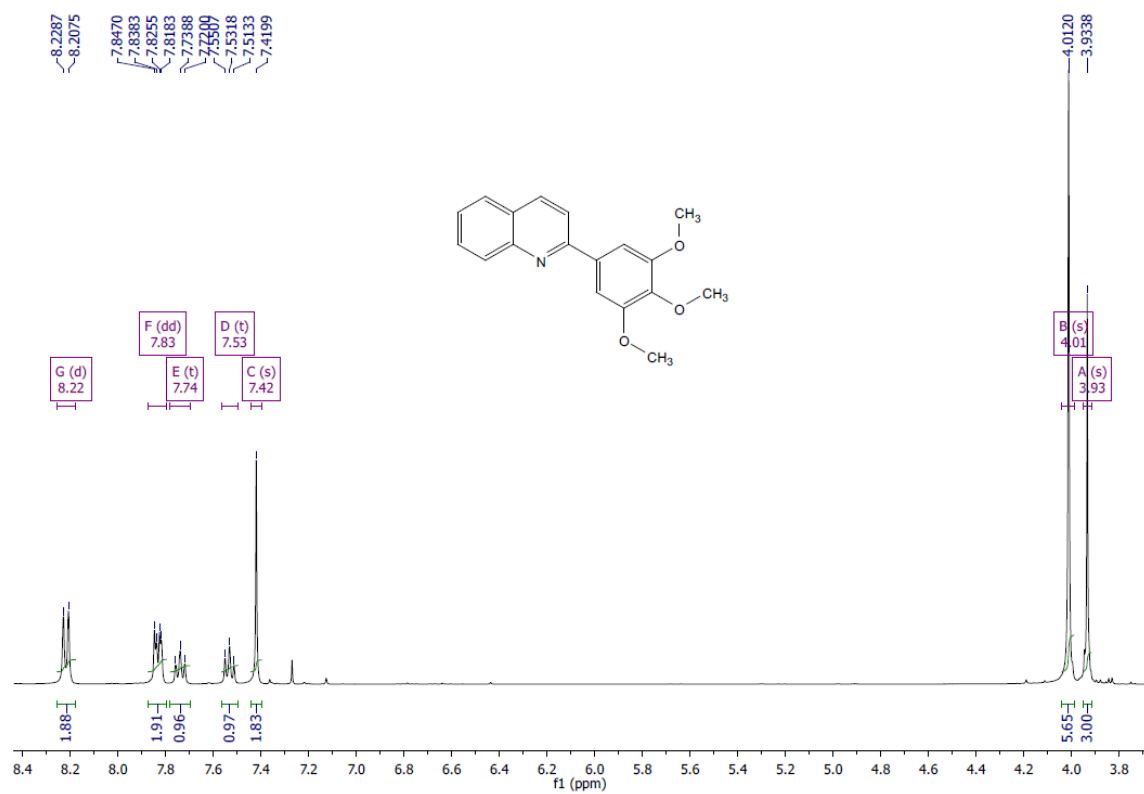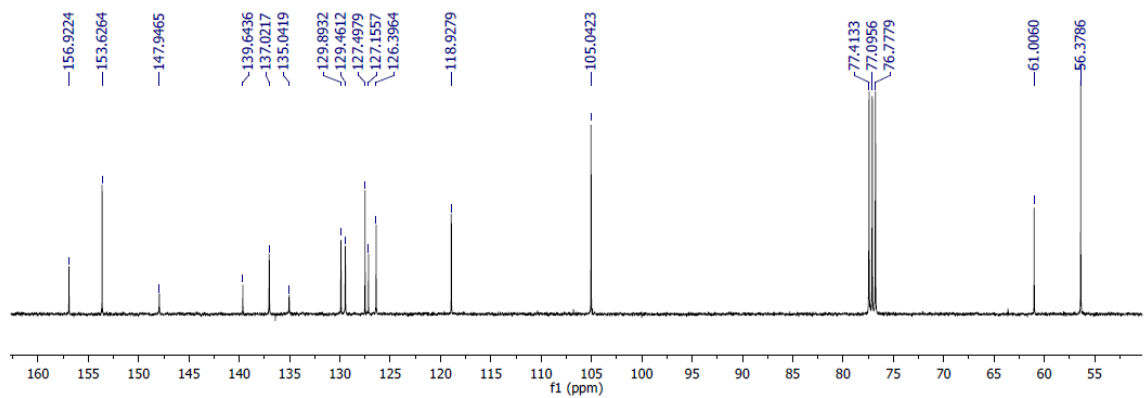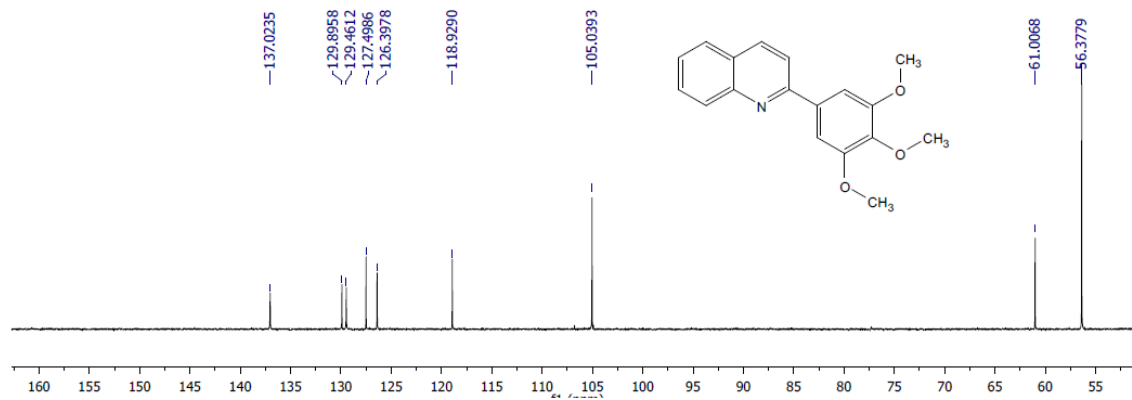

24g

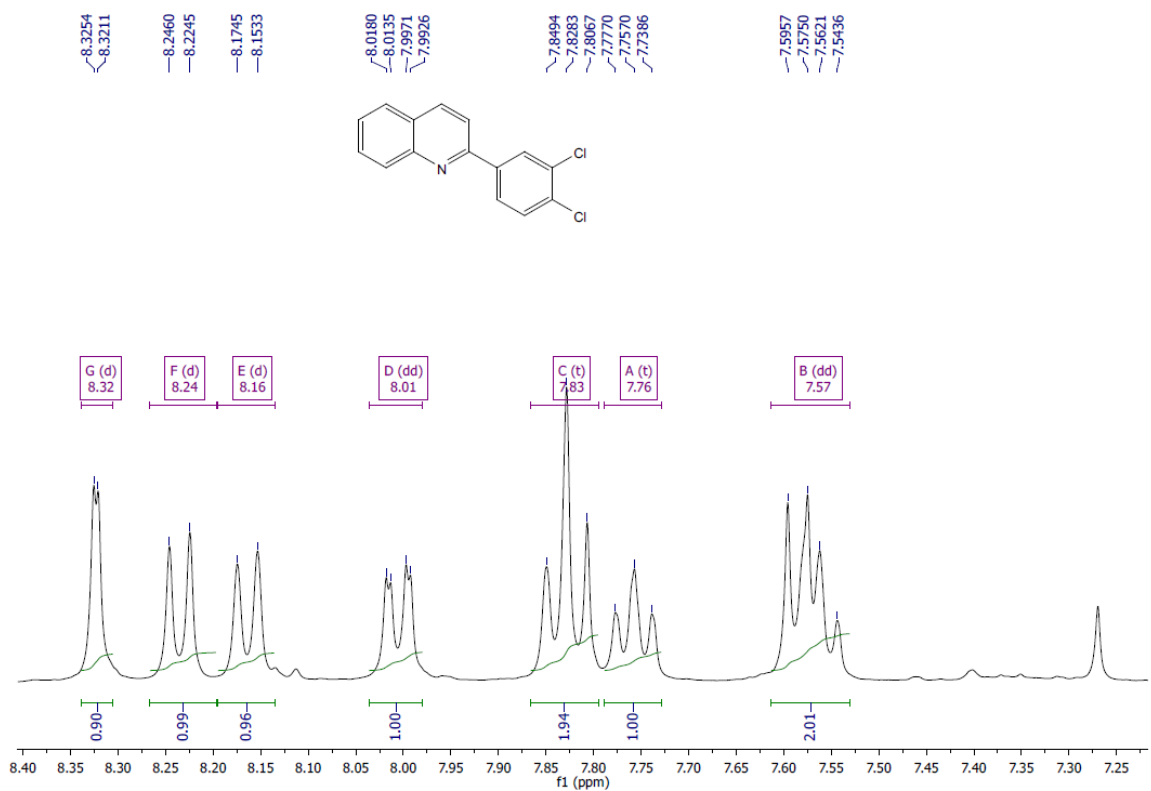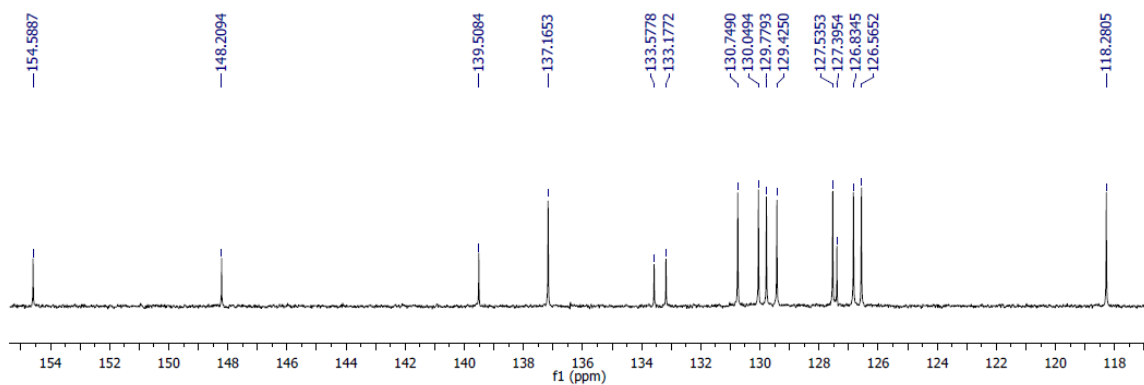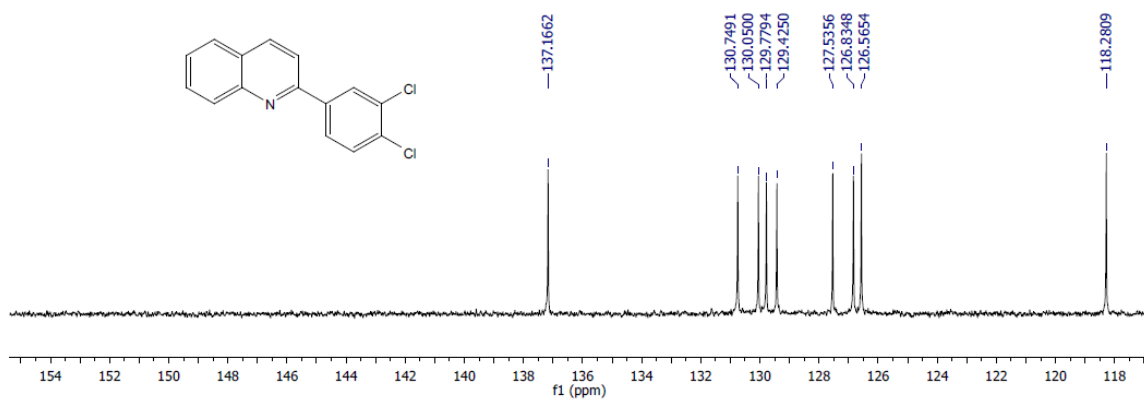

24h

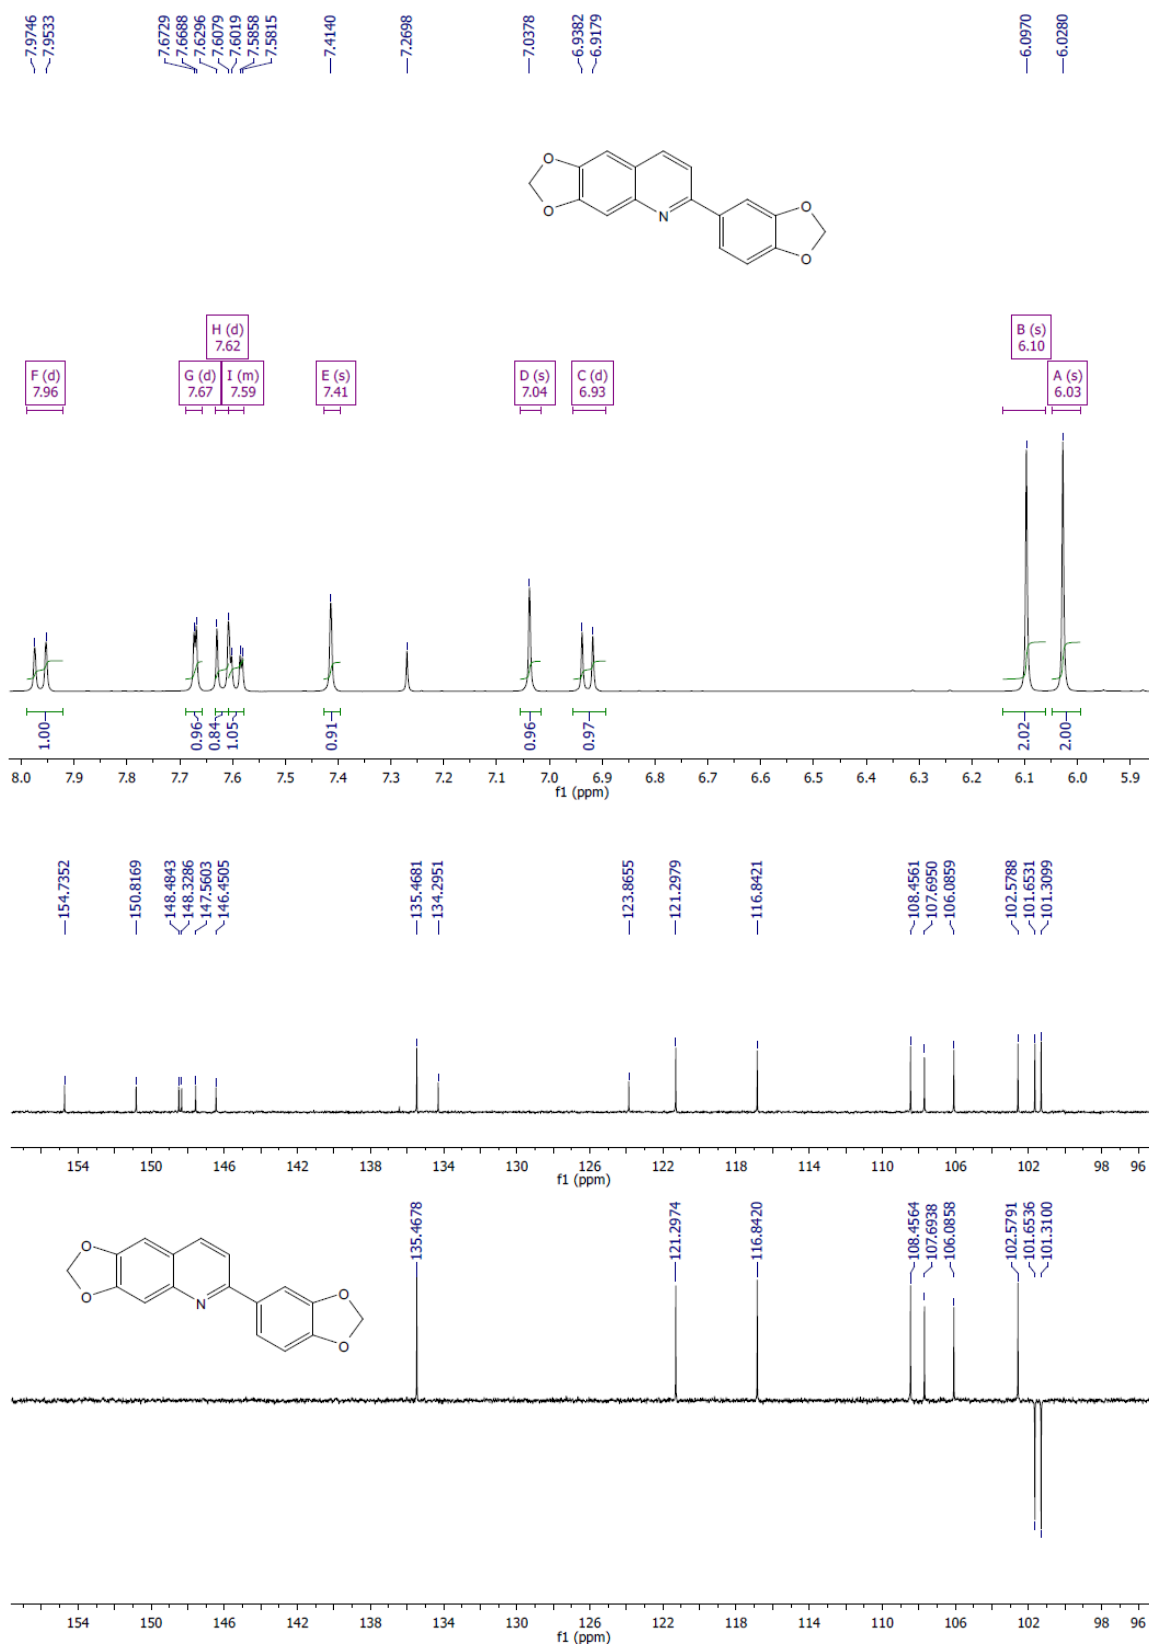

## Dubamine 2

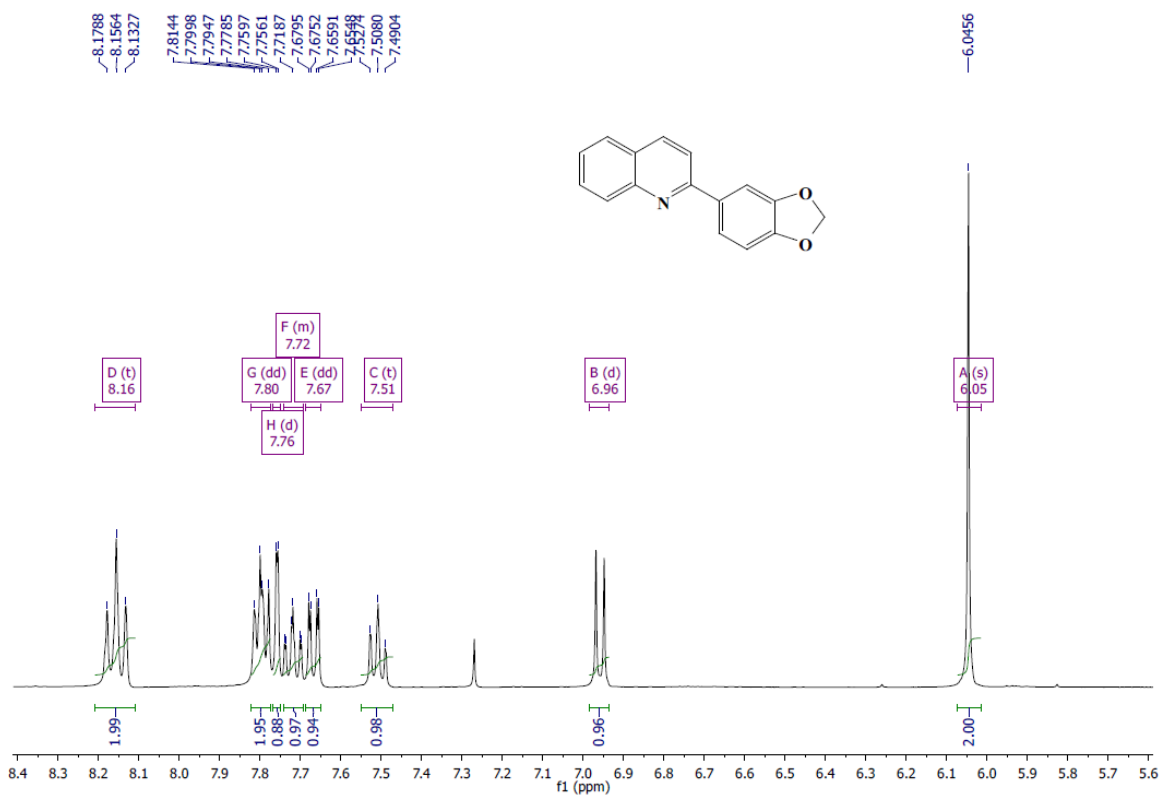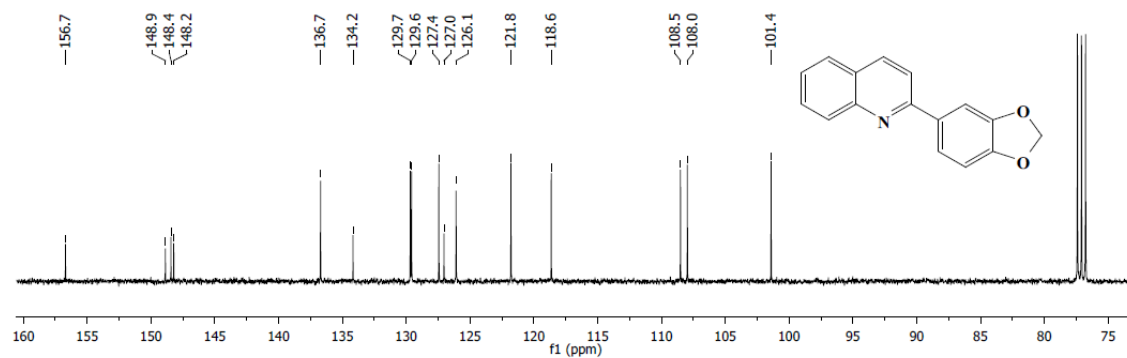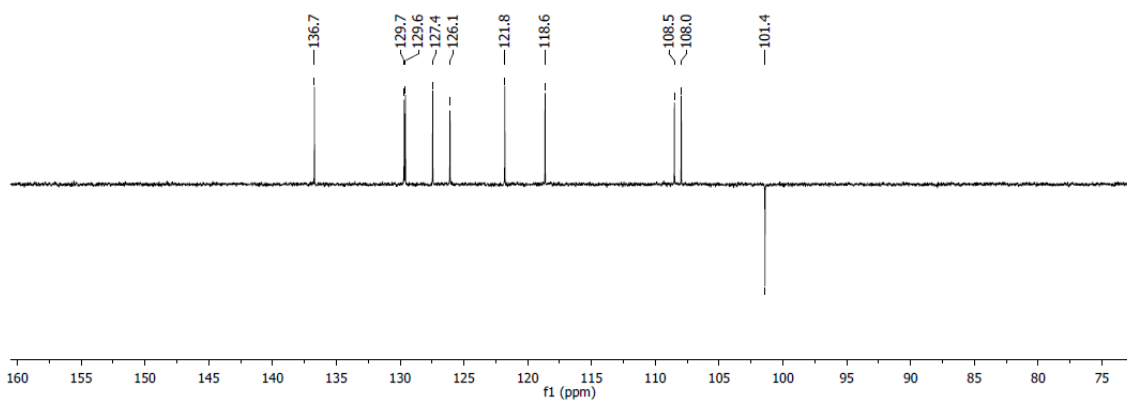

26a

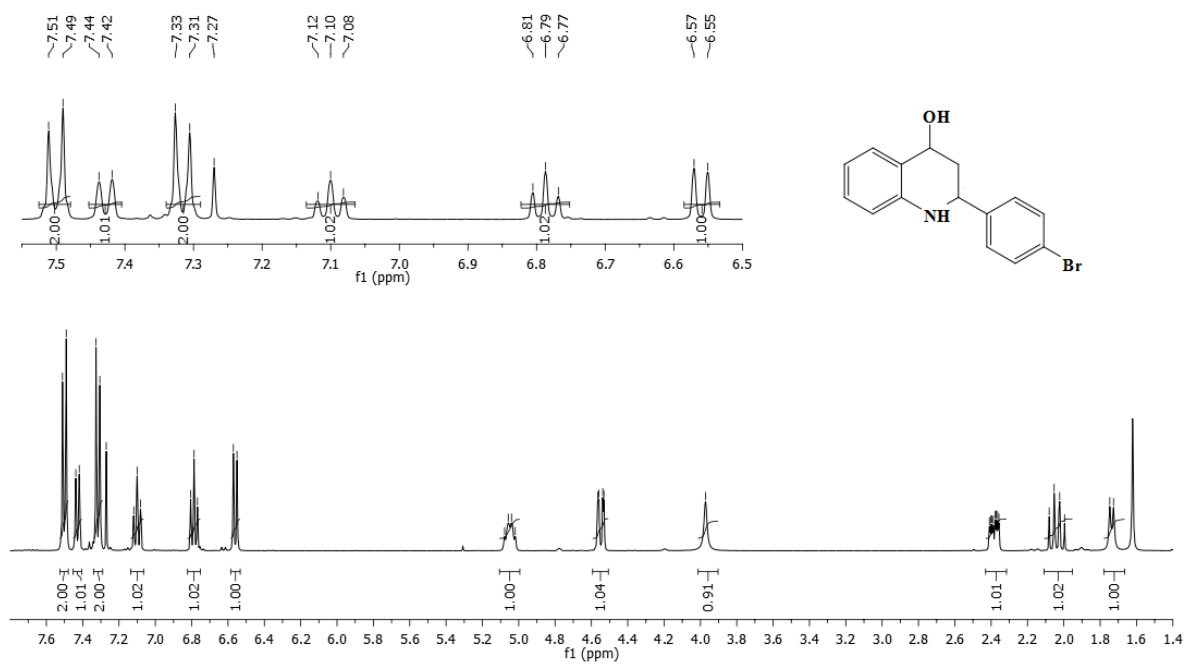

Supplement: s1 [file s1]
